# The periaqueductal grey in chronic low back pain: dysregulated metabolites and function

Laura Sirucek,<sup>1,2</sup> Iara De Schoenmacker,<sup>2,3</sup> Lindsay Gorrell,<sup>1</sup> Robin Lütolf,<sup>3</sup> Anke Langenfeld,<sup>1</sup> Mirjam Baechler,<sup>1</sup> Brigitte Wirth,<sup>1</sup> Michèle Hubli,<sup>3</sup> Niklaus Zölch,<sup>4,5</sup> and Petra Schweinhardt<sup>1</sup>

## Abstract

Mechanisms underlying chronic pain are insufficiently understood. Preclinical evidence suggests a potential contribution of excitatory glutamatergic and inhibitory GABAergic imbalances in pain-relevant brain areas, such as a lower excitatory/inhibitory tone in the brainstem periaqueductal grey (PAG). This cross-sectional magnetic resonance spectroscopy (MRS) study investigated whether a lower excitatory/inhibitory tone is also observed in the PAG of patients with non-specific chronic low back pain (CLBP) and whether this would relate to altered psychophysical measures of descending pain modulation and experimental pressure pain sensitivity. Specifically, the ratio between pooled glutamate and glutamine and GABA levels (Glx/GABA), Glx and GABA in the PAG were compared between CLBP patients and pain-free controls. Further, associations of Glx/GABA with conditioned pain modulation (CPM) effects and pressure pain thresholds (PPTs) were assessed.

MRS was acquired on a 3T Philips MR system using a point-resolved spectroscopy sequence optimized with very selective saturation pulses (OVERPRESS) and voxel-based flip angle calibration in a 1.1 mL volume of interest. Data from 41 CLBP patients (median [interquartile range]: 54 years [41 - 65], 22 females) and 29 age- and sex-matched controls (47 years [34 - 67], 17 females) fulfilled MRS quality criteria. CPM and PPTs were assessed at the lower back as most painful area and the non-dominant hand as pain-free control area. The CPM paradigm consisted of PPTs applied before, during (parallel CPM effect) and after a cold water bath and an ambient temperature water bath as control paradigm to identify 'true' CPM effects.

In the PAG of CLBP patients, a lower Glx/GABA ratio, i.e. a lower excitatory/inhibitory tone, was observed ( $P = 0.002$ ,  $partial \eta^2 = 0.14$ ) driven by decreased Glx ( $P = 0.012$ ,  $partial \eta^2 = 0.11$ ) and increased GABA ( $P = 0.038$ ,  $d = 0.46$ ). CLBP patients showed disrupted associations between Glx/GABA and PPTs compared to controls in both areas (lower back:  $P = 0.004$ ,

**NOTE: This preprint reports new research that has not been certified by peer review and should not be used to guide clinical practice.**

*partial*  $\eta^2 = 0.12$ ; hand:  $P = 0.002$ , *partial*  $\eta^2 = 0.16$ ). In controls, lower Glx/GABA was associated with lower PPTs (lower back:  $r = 0.48$ ,  $P = 0.009$ , hand:  $r = 0.53$ ,  $P = 0.003$ ), but this link was missing in CLBP patients ( $r$ 's  $> -0.23$ ,  $P$ 's  $> 0.150$ ). Additionally, CLBP patients with more severe clinical pain showed smaller CPM effects at the hand ( $\rho = 0.54$ ,  $P = 0.003$ ).

These findings suggest a dysfunction of the PAG in patients with CLBP and might indicate altered descending inhibition of deep tissue afferents.

### **Author affiliations:**

1 Department of Chiropractic Medicine, Balgrist University Hospital, University of Zurich, 8008 Zurich, Switzerland

2 Neuroscience Center Zurich, University of Zurich, 8057 Zurich, Switzerland

3 Spinal Cord Injury Center, Balgrist University Hospital, University of Zurich, 8008 Zurich, Switzerland

4 Department of Forensic Medicine and Imaging, Institute of Forensic Medicine, University of Zurich, 8057 Zurich, Switzerland

5 Department of Psychiatry, Psychotherapy and Psychosomatics, Psychiatric Hospital, University of Zurich, 8032 Zurich, Switzerland

Correspondence to: Laura Sirucek

Integrative Spinal Research

Balgrist Campus

Lengghalde 5

8008 Zurich

Switzerland

[laura.sirucek@balgrist.ch](mailto:laura.sirucek@balgrist.ch)

**Running title:** Brainstem metabolites in chronic pain

**Keywords:** brainstem, excitatory/inhibitory balance, chronic pain, conditioned pain modulation, pressure pain thresholds

**Abbreviations:** CLBP = non-specific chronic low back pain; CPM = conditioned pain modulation; CRLB = Cramér-Rao lower bounds; CS = conditioning stimulus; DNIC = diffuse noxious inhibitory controls; FDR = false discovery rate; FWHM = full width at half maximum; Glx = glutamate + glutamine; GM = grey matter; <sup>1</sup>H-MRS = proton magnetic resonance spectroscopy; HADS = Hospital Anxiety and Depression Scale; MAD = median absolute deviation; NRS = numeric rating scale; PAG = periaqueductal grey; PCS = Pain Catastrophizing Scale; PPT = pressure pain threshold; PRESS = Point-RESolved Spectroscopy; RVM = rostral ventromedial medulla; SEM = standard error of measurement; SNR = signal-to-noise ratio; tCre = creatine + phosphocreatine; tCho = glycerophosphocholine + phosphocholine; tmI = myo-inositol + glycine); tNAA = N-acetylaspartate + N-acetylaspartylglutamate; TE = echo time; TR = repetition time; TSP = temporal summation of pain; VOI = volume of interest; VSS = Very Selective Saturation; WM = white matter.

## Introduction

Acute pain is vital to protect organisms from harm.<sup>1</sup> However, when pain becomes chronic, it often loses its protective function and causes major suffering for the individual<sup>2</sup> and tremendous societal costs.<sup>3</sup> Effective treatment options are lacking because the mechanisms underlying the development or maintenance of chronic pain are insufficiently understood. Preclinical evidence suggests excitatory glutamatergic/inhibitory GABAergic imbalances in pain-relevant brain regions as a potential contributor to chronic pain.<sup>4</sup> In chronic pain patients, alterations of glutamate,<sup>5-13</sup> glutamine,<sup>14-16</sup> pooled levels of glutamate and glutamine (Glx),<sup>5-7,9-13,17-26</sup> or GABA<sup>27-35</sup> have been demonstrated in pain-relevant brain regions, including the insula,<sup>10,14-17,19,30</sup> cingulate cortex,<sup>5,6,8,9,11,12,16,21,27,32</sup> or thalamus<sup>18,26,31,33</sup> using proton magnetic resonance spectroscopy (<sup>1</sup>H-MRS).<sup>36</sup>

One brain region in which excitatory/inhibitory imbalances might have a substantial impact on pain processing is the periaqueductal grey (PAG). This key descending pain modulatory brainstem region<sup>37</sup> exerts pain inhibition or facilitation via descending projections to the rostral ventromedial medulla (RVM) and the spinal cord.<sup>38</sup> Based on the 'GABA disinhibition' hypothesis,<sup>37</sup> PAG-driven descending pain inhibition is activated by switching off tonic GABAergic controls of descending glutamatergic projections. Conceivably, an excessive GABAergic tone in the PAG might impede its inhibitory function and contribute to aberrant pain processing. A reduced glutamatergic tone could have a similar effect because glutamate release can indirectly inhibit GABAergic controls in the PAG.<sup>39</sup> In line with these notions, an augmented GABAergic tone<sup>40</sup> as well as a hypo-glutamatergic state<sup>40</sup> has been observed in the PAG of animal models of chronic neuropathic pain.<sup>41</sup> In humans, investigations of PAG neurochemistry are scarce,<sup>42-45</sup> possibly because <sup>1</sup>H-MRS in the PAG is technically challenging. The PAG's small size of approximately 4-5 mm (diameter) x 14 mm<sup>46</sup> makes it difficult to obtain sufficient signal. Additionally, its proximity to pulsating vessels and CSF causes high levels of physiological noise,<sup>47</sup> further decreasing the signal-to-noise ratio (SNR).<sup>48</sup> Existing PAG <sup>1</sup>H-MRS studies have addressed these challenges by using long echo times which reduces the influence from macromolecules and lipids on the spectrum benefitting reliable metabolite detection but hampers detection of J-coupled metabolites such as Glx or GABA,<sup>43</sup> or by using large volumes of interest (VOI), which increases SNR but limits regional specificity.<sup>42,45</sup>

In the present study, we adopted an improved approach enabling high-quality  $^1\text{H}$ -MRS acquisition in the PAG (<https://doi.org/10.1101/2023.03.29.534678>) with the aim to investigate neurochemical alterations in patients with non-specific chronic low back pain (CLBP). In brief, Glx and GABA were measured in a 1.1 mL small VOI using a Point-RESolved Spectroscopy sequence (PRESS)<sup>49,50</sup> combined with Very Selective Saturation (VSS) pulses (OVERPRESS)<sup>51-53</sup> and voxel-based flip angle calibration<sup>54,55</sup> to optimize MRS acquisition, and with spectral registration to optimize MRS preprocessing.<sup>56</sup> Specifically, the PAG's excitatory/inhibitory balance, conceptualized as Glx/GABA, was compared between patients with CLBP and pain-free controls. Lower Glx/GABA, i.e. decreased Glx and/or increased GABA, was expected in CLBP patients. In addition, it was investigated whether Glx/GABA was related to a psychophysical measure of descending pain modulation, i.e. conditioned pain modulation (CPM).<sup>57</sup> CPM is considered the human counterpart of diffuse noxious inhibitory controls (DNIC)<sup>58,59</sup> and assesses how the perceived pain intensity of a noxious test stimulus is altered by another, heterotopically applied, noxious "conditioning" stimulus (CS). A lower excitatory/inhibitory tone, i.e. lower Glx/GABA, was expected to be associated with smaller CPM effects indicative of weaker descending pain modulatory capacity. Finally, associations of Glx/GABA with experimental pressure pain sensitivity, and associations of Glx/GABA and CPM effects with clinical characteristics were explored.

## Materials and methods

### Participants

CLBP patients were consecutively recruited via the Balgrist University Hospital and advertisements in Swiss Chiropractic practices and patient magazines. Individually age- and sex-matched, pain-free controls were recruited via online advertisements and oral communication. The recruitment period, data collection period and sample size calculation are described in Supplementary Methods M1. Inclusion criteria for CLBP patients were between 18 and 80 years of age, good general health and CLBP as primary pain complaint without "red flags" (e.g. signs of infection, fractures, inflammation) and of a duration longer than 3 months. For controls, the same inclusion criteria were applied with the additional requirement that they had not experienced low back pain lasting longer than 3 consecutive days during the last year.

Exclusion criteria for both cohorts comprised any major medical or psychiatric condition other than CLBP, symptomatic radiculopathy (i.e. motor and sensory deficits), pregnancy, inability to follow study instructions or contraindications to MRI. The study was approved by the local ethics committee "Kantonale Ethikkommission Zürich" (Nr.: 2019-00136), registered on [clinicaltrials.gov](https://clinicaltrials.gov) (NCT04433299), and performed according to the guidelines of the Declaration of Helsinki (2013). Written informed consent was obtained from all participants before the start of the experiment.

## Study design

This study was part of a larger project (Clinical Research Priority Program "Pain", <https://www.crpp-pain.uzh.ch/en.html>) which comprised 3 experimental sessions of approximately 3 hours each and electronic questionnaires. In the first 2 sessions, participants underwent clinical, neurophysiological and psychophysical assessments. The CPM assessment was always performed in the second session preceded by the acquisition of pain-evoked potentials. During the third session, participants underwent 2 MR measurements, 1  $^1\text{H}$ -MRS scan and 1 resting state functional MRI scan with a break of 1 hour between. All scans were performed after 12 pm. The present study concerns the  $^1\text{H}$ -MRS, the CPM, the pain drawings and experimental pressure pain sensitivity of the first session's psychophysical assessment and questionnaire data. Fig. 1 shows an overview of the study design.

## Magnetic resonance spectroscopy

Substantial material in this section is identical to a technical note (<https://doi.org/10.1101/2023.03.29.534678>) focused on methodological aspects of high-quality  $^1\text{H}$ -MRS acquisition in the PAG using the data of the controls. Technical details of the  $^1\text{H}$ -MRS are listed in Supplementary Table 1. The following sections provide a brief overview of the applied methods.

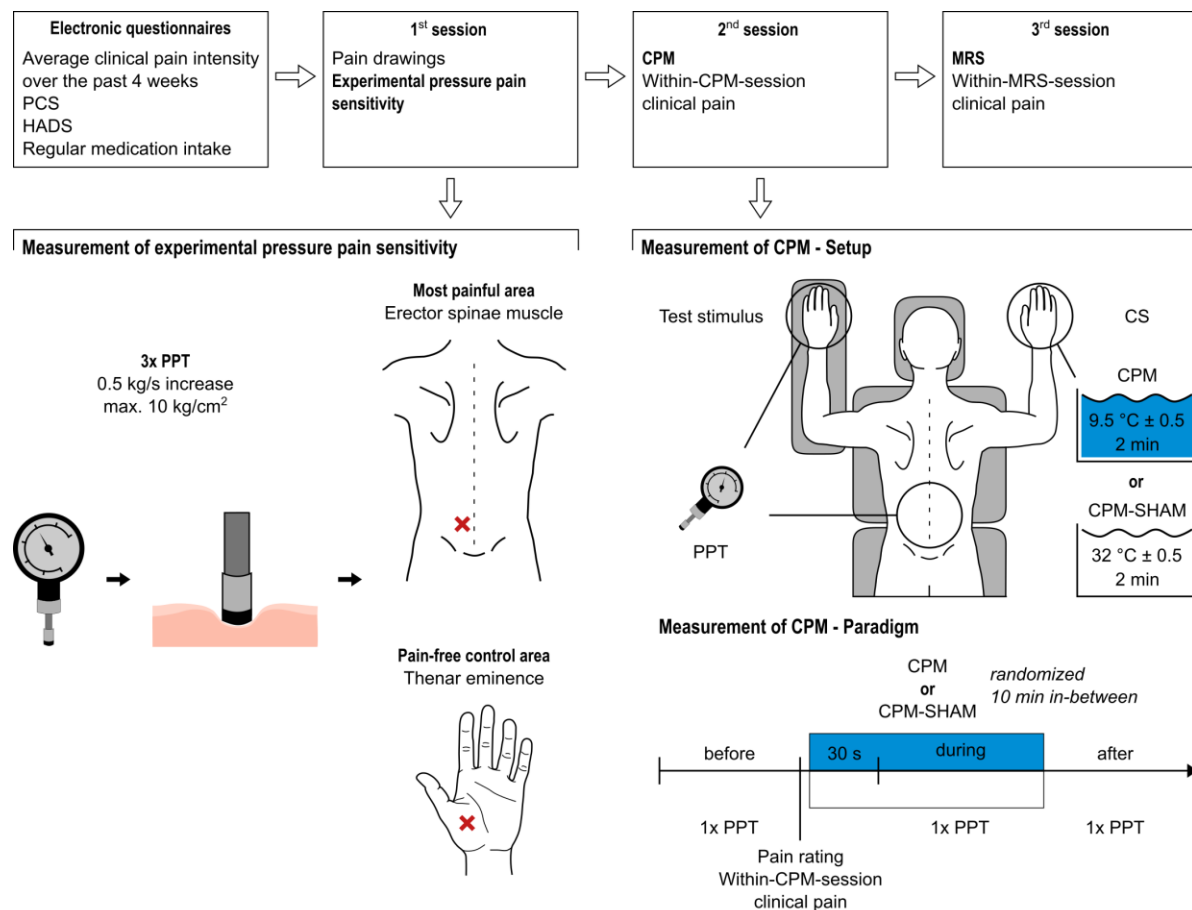

**Figure 1 Study design overview.** Main outcomes of interest are highlighted in bold italic. Red crosses indicate locations at which PPTs were assessed, i.e. over the erector spinae muscle within the lower back (most painful area) and at the thenar eminence of the non-dominant hand (pain-free control area). The CPM-SHAM paradigm was only performed at the non-dominant hand.

## Acquisition

$^1\text{H}$ -MRS was acquired on a 3T MR system using a 32-channel head coil (Philips Healthcare, Best, The Netherlands). Prior to  $^1\text{H}$ -MRS acquisition, high-resolution ( $1\text{ mm}^3$  isotropic) anatomical  $T_1$ -weighted images were obtained (acquisition time: 7 min 32 s). Based on the 3D  $T_1$  images, the VOI was placed to cover the PAG according to anatomical landmarks by the same examiner (LS) for all participants (Fig. 2A). Spectra were localized using a water-suppressed single-voxel OVERPRESS sequence<sup>49-53</sup> (repetition time (TR): 2500 ms, TE: 33 ms, number of signals averaged: 512 divided into 8 blocks of 64; acquisition time: 23 min 20 s). The use of VSS pulses minimizes errors in chemical-shift displacement and allows for consistent localization volumes across all metabolites of interest (Fig. 2A). The voxel-based flip angle calibration<sup>54,55</sup> achieves an optimal flip angle within the VOI. Accounting for the



VSS pulses, the resulting VOI size was  $8.8 \times 10.2 \times 12.2 \text{ mm}^3 = 1.1 \text{ mL}$ . For each individual, 2 water signals were acquired: 1 obtained from interleaved water unsuppressed spectra (1 before each of the 8 blocks) for eddy-current correction and internal water referencing corrected for partial volume and tissue-specific relaxation effects using literature-based  $T_1$  and  $T_2$  relaxation times;<sup>60</sup> 1 measured in a separate water reference scan after the  $^1\text{H}$ -MRS acquisition in the PAG within the same VOI with a TR of 10000 ms and varying TEs (33/66/107/165/261/600 ms), allowing estimation of the  $T_2$  relaxation time of water within the VOI. Hereby, a literature-independent, subject-specific approximation of the fully-relaxed water signal was obtained.<sup>61</sup>

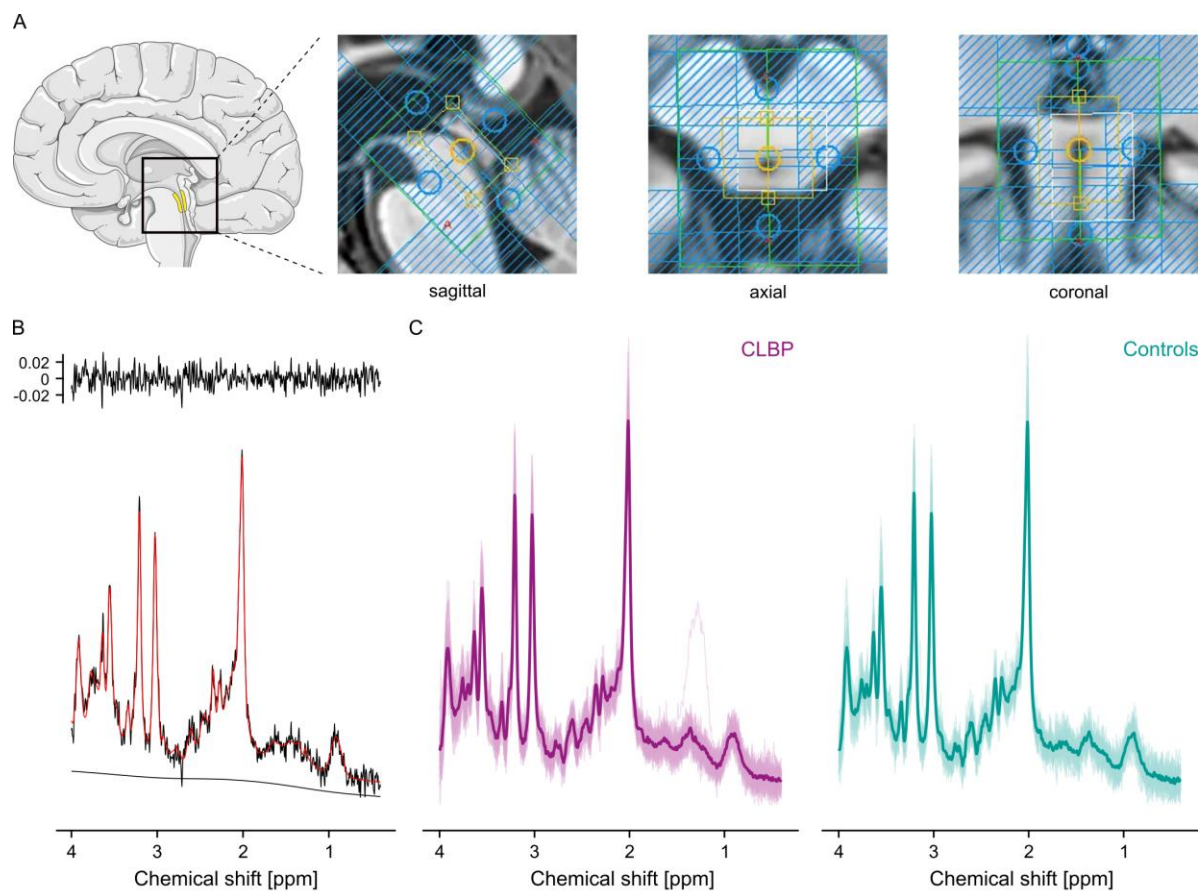

**Figure 2  $^1\text{H}$ -MRS VOI placement and acquired spectra.** (A) The VOI was placed according to anatomical landmarks such as the cerebral aqueduct. The yellow box represents the nominal size of the VOI ( $11 \times 15 \times 18 \text{ mm}^3$  [AP $\times$ LR $\times$ FH]). Blue-shaded areas represent the VSS bands used to minimize errors in chemical-shift displacement and to achieve consistent localization volumes across all metabolites of interest. The unshaded area within the yellow box represents the final VOI size ( $8.8 \times 10.2 \times 12.2 \text{ mm}^3$ ). (B) Representative single spectrum (SNR = 19, FWHM  $\text{H}_2\text{O}$  = 5.1 Hz, age = within 53.5 years (median age of the cohort)  $\pm$  5). (C) Overlaid single spectra together with the group average (bold) for CLBP patients (purple) and controls (turquoise). The schematic brain was adapted from Servier Medical Art ([smart.servier.com](https://smart.servier.com)).



## **Preprocessing and analysis**

The T<sub>1</sub>-weighted images were segmented into grey matter (GM), white matter (WM) and CSF to obtain the respective tissue fractions (in %) within the VOI using SPM12.<sup>62</sup>

Frequency alignment was performed using spectral registration in the time domain (adopted from<sup>56,63</sup>). For that, the data were filtered with a 2 Hz Gaussian filter. Only the first 500 ms were used for alignment and the single averages were aligned to the median of all averages. Preprocessing was performed by an author blinded to the hypotheses of the study (NZ).

The preprocessed spectra were inspected for artefacts. Spectra with artefacts were excluded from further analyses, as were spectra presenting with insufficient quality,<sup>55</sup> i.e. with a full width at half maximum (FWHM) value of the unsuppressed water peak (FWHM H<sub>2</sub>O; shim quality indicator) above 2.5 median absolute deviation (MAD)<sup>64</sup> of the group median or with a SNR below 2.5 MAD of the group median.

## **Metabolite quantification**

Spectra were analyzed using LCMoDel (6.3)<sup>65</sup> with a metabolite basis set simulated using FID-A taking into account spatial localization and actual radiofrequency pulse shapes.<sup>63</sup> Metabolite concentrations are reported as ratios to the unsuppressed water signal and reflect an estimation of metabolite concentration in moles per kg of tissue water excluding water within CSF. As primary outcome, the subject-specific water signal was used. In addition to being independent of literature-based tissue-specific T<sub>1</sub> and T<sub>2</sub> relaxation times, known to vary across brain regions<sup>66-68</sup> and possibly not generalizable to the PAG, this approach relies less on the correct segmentation of GM, WM, and CSF compared to the literature-based approach. For comparison, all analyses were also performed using the literature-based water signal.

## **Conditioned pain modulation**

Participants were tested in a prone position in a quiet room (temperature 20-25 °C). The CPM assessment was performed by a trained experimenter blinded to the hypotheses of the study. Participants were given standardized verbal instructions.

CPM was assessed at the patient's most painful area in the lower back and at the non-dominant hand as a remote, pain-free control area. The order of the 2 areas was randomized and

counterbalanced. The exact area on the lower back, the laterality of the hand (right or left) and the order of the 2 areas in each control was identical to the patient to whom they were individually age- and sex-matched.

The CS consisted of a circulating cold water bath ( $9\text{ }^{\circ}\text{C} \pm 0.5$ ) in which the participants immersed their dominant hand up to the wrist for 2 min. The perceived pain intensity of the CS was rated on a numeric rating scale (NRS) from 0 'No pain' to 10 'Maximum pain tolerable' directly after immersion, 30 s after immersion and immediately before withdrawal of the hand. If the pain became intolerable, participants were allowed to withdraw their hand but were encouraged to re-immerses their hand as soon as possible.

The test stimulus consisted of pressure pain thresholds (PPT) assessed before, during (30 s after CS onset; 'parallel CPM effect'), and after (mean 2 min 58 s, SD = 49 s after CS end; 'sequential CPM effect') the CS. PPTs were chosen as test stimulus because (1) deep afferents are likely to play a more important role compared to superficial afferents in CLBP as musculoskeletal pain condition and (2) the combination with a cold water bath as CS has been shown to be the CPM paradigm with the highest intra-session reliability<sup>69</sup> and with larger CPM effects compared to other TS-CS combinations.<sup>70</sup> Pressure was applied using a hand-held mechanical algometer (Wagner Instruments, Greenwich, CT, USA) with a circular rubber tip (1 cm diameter). For the lower back, PPTs were assessed over the erector spinae muscle at the level and the body side of the most painful area. For the hand, PPTs were assessed at the thenar eminence. One PPT per timepoint was determined using the method of limits.<sup>71</sup> If no pain was reported at  $10\text{ kg/cm}^2$  (safety cut-off to avoid tissue damage), a value of  $11\text{ kg/cm}^2$  was assigned as the PPT. Three additional test stimuli were administered, i.e. pressure temporal summation of pain (TSP), heat pain thresholds and heat TSP. The order of pressure and heat assessments was randomized and counterbalanced and TSP was always performed after the threshold assessments. These test stimuli answer a different research question and will not be discussed further; relevant here is that the paradigm was identical between the CLBP patients and the controls.

At the hand, an additional CPM-SHAM paradigm was performed to test whether the used CPM paradigm induced a 'true' CPM effect beyond repeated-measures effects.<sup>72</sup> The CPM-SHAM paradigm was performed identically to the CPM paradigm except for an ambient temperature water bath ( $32\text{ }^{\circ}\text{C} \pm 0.5$ ) as CS. Within the assessment of the hand, the order of CPM and CPM-SHAM paradigms was randomized and counterbalanced with a minimum of 10 min between.

## Clinical characteristics

As part of the electronic questionnaires, CLBP patients reported their average clinical pain intensity over the past 4 weeks (NRS: 0 'No pain' to 10 'Maximum pain'). To allow for differentiation between this 'trait' pain and the 'state' pain during the experimental sessions, 2 additional pain intensity ratings were acquired: (1) *within-MRS-session clinical pain*, where after the <sup>1</sup>H-MRS scan, CLBP patients rated the maximum pain they had experienced during the scan (NRS: 0 'No pain' to 10 'Most intense pain tolerable') and (2) *within-CPM-session clinical pain*, where CLBP patients reported the current pain intensity in their most painful area before the first water bath on the same NRS as for (1).

CLBP patients completed pain drawings before the first experimental session to assess the spatial pain extent (% of total body area) of their typically painful body areas<sup>73-76</sup> (Supplementary Methods M2).

Participants also completed the Pain Catastrophizing Scale (PCS)<sup>77</sup> and the Hospital Anxiety and Depression Scale (HADS).<sup>78</sup> The PCS consists of 13 items with a score range between 0 and 52 (> 30 clinically relevant level of catastrophizing). The HADS consists of 14 items with a 7-item anxiety-subscale and a 7-item depression-subscale, with a score range between 0 and 21 per subscale (8-10 moderate and 11-21 high probability for a mood disorder).

## Confounding factors

Prior to the CPM and the <sup>1</sup>H-MRS session, information about the menstrual cycle phase was obtained if applicable, i.e. in premenopausal women not using menstruation-suppressing contraceptives.

In the electronic questionnaires, participants were asked to indicate any regular medication intake. Medications were classified according to the ATC/DDD classification by the World Health Organization ([http://www.whooc.no/atc\\_ddd\\_index/](http://www.whooc.no/atc_ddd_index/)). The following categories were considered pain-relevant: M01A (anti-inflammatory and anti-rheumatic drugs and non-steroids), N02 (analgesics), N03 (antiepileptics), N05 (psycholeptics), and N06 (psychoanaleptics).

## Statistical analysis

All statistical analyses were performed in RStudio<sup>79,80</sup> for Mac (2022.12.0+353). Statistical significance was set at  $\alpha = 0.05$  with a false discovery rate (FDR) correction per tested research question. The number of corrected tests per research question is indicated as  $n$ -FDR.

Depending on the statistical test used, raw values or model residuals were assessed for normal distribution using inspection of histograms and QQplots. All ordinal or non-normally distributed variables are reported as median (interquartile range) and were analyzed using non-parametric tests. All continuous variables are reported as mean (SD) and were analyzed using parametric tests.

Group comparisons were performed using linear models (Supplementary Methods M3). This allowed for the examination of the potential influences of age and sex on the dependent variables and of influential cases in a standardized manner (Supplementary Methods M4). For all models, the number of identified influential cases is indicated as  $n$ -IC. If removal of influential cases changed the statistical inferences, the results of the model without the influential cases are reported (indicated as  $n$ -IC<sup>†</sup>). Otherwise, the results of the full data set are reported.

Effect sizes are reported using *partial*  $\eta^2$  (small: 0.01, medium: 0.06, large: 0.14)<sup>81</sup> for linear models, Cohen's  $d$  (small:  $< 0.5$ , medium: 0.5-0.8, large:  $> 0.8$ )<sup>81</sup> for t-tests and  $r$  (small: 0.1- $< 0.3$ , medium: 0.3- $< 0.5$ , large:  $\geq 0.5$ )<sup>82</sup> for Wilcoxon rank-sum tests. No effect sizes are reported for linear mixed models because no agreement on standard effect sizes exists.<sup>83</sup>

## Magnetic resonance spectroscopy

Group comparisons were performed for: (1) Glx/GABA as main outcome of interest; (2) Glx and GABA separately to examine which metabolite drove the observed group difference in Glx/GABA ( $n$ -FDR: 2); and (3) tCre (creatine + phosphocreatine), tCho (glycerophosphocholine + phosphocholine), tmI (myo-inositol + glycine), tNAA (N-acetylaspartate + N-acetylaspartylglutamate), as well as GM, WM and CSF tissue fractions (only the analysis of Glx and GABA were included in the multiple comparison correction because the other outcomes were not part of the primary research question). For GABA and CSF tissue fraction,

group comparisons were performed using a Welch's t-test and Wilcoxon test, respectively, because linear model assumptions were not met.

Because differences in Glx or GABA might be confounded by differences in GM or WM tissue fractions, it was investigated whether Glx or GABA correlated with GM or WM tissue fractions in the controls, i.e. a 'healthy' state, using Pearson correlations (without multiple comparison correction to minimize the risk for false negatives).

## **Conditioned pain modulation**

CPM effects were calculated as follows: parallel CPM effect = PPT before – PPT during, sequential CPM effect = PPT before – PPT after. Thus, inhibitory CPM effects are denoted by a negative value and facilitatory CPM effects by a positive value.<sup>84</sup> For all *within-subject* analyses, absolute values were used. For all *between-subject* and correlational analyses, relative differences, i.e.  $((\text{PPT before} - \text{PPT during}) / \text{PPT before}) * 100$ , were used to allow direct comparisons between the lower back and the hand (which might have different PPTs). Maximum CPM inhibition and CPM facilitation was set to  $\pm 100\%$ .

*Within-subject analyses:* Firstly, the presence of 'true' CPM effects beyond repeated-measures effects was tested using a linear mixed model on the data of the controls (Supplementary Methods M3). The effect of interest was the interaction between 'timepoint' (levels: 'before', 'during', and 'after') and 'paradigm' (levels: 'CPM', 'CPM-SHAM'). All subsequent analyses were performed using the detected 'true' CPM effect, i.e. the CPM timepoint which showed a significant 'timepoint X paradigm'.

Secondly, it was analyzed whether this 'true' CPM effect was present in both cohorts in both areas. For that, 4 linear mixed models were performed (Supplementary Methods M3) (*n*-FDR: 2 per cohort).

*Between-subject analyses:* Group comparisons were performed for 'true' CPM effects in both areas (*n*-FDR: 2).

Additionally, participants were classified into CPM-inhibitors (PPT increase during CPM > 2 standard error of measurement (SEM) of PPTs), CPM-facilitators (PPT decrease > 2 SEM) or CPM-non-responders (PPT increase/decrease  $\leq$  2 SEM)<sup>85</sup> (Supplementary Methods M5). Proportions of CPM-inhibitors, CPM-facilitators and CPM-non-responders in both areas were compared between the cohorts using Fisher's exact tests ( $n$ -FDR: 2).

## **Associations of Glx/GABA with CPM effects and experimental pressure pain sensitivity**

Associations of Glx/GABA with 'true' CPM effects and experimental pressure pain sensitivity were tested using linear models because this allowed to test for 'cohort' (levels: 'controls', 'CLBP') interaction effects ('true' CPM effect X cohort' and 'experimental pressure pain sensitivity X cohort'), i.e. whether the associations differed between the cohorts. Associations were examined for both areas ( $n$ -FDR: 2 for 'true' CPM effects and 2 for experimental pressure pain sensitivity).

PPTs were used as a proxy for experimental pressure pain sensitivity. Here, PPTs from the first experimental session of the larger project were used to avoid a flawed analysis because a random string B-A (here the 'true' CPM effect) will typically correlate with a random string A (here PPTs before CPM). In the first experimental session, for each testing area, 3 PPTs were acquired.<sup>71</sup> The average PPT of each area was used for analysis.

Two Spearman correlations were performed to explore whether the 'true' CPM effects depended on experimental pressure pain sensitivity in the controls, i.e. a 'healthy' state.

## **Associations of Glx/GABA and CPM effects with clinical characteristics**

In CLBP patients, Spearman correlations were used to investigate associations of Glx/GABA and 'true' CPM effects in both areas with clinical characteristics, i.e. (1) average clinical pain intensity over the past 4 weeks, (2) pain duration (in months), (3) spatial pain extent, and (4) within-MRS-session clinical pain or within-CPM-session clinical pain because 'state' pain can confound comparisons between pain and pain-free cohorts.<sup>86</sup> ( $n$ -FDR: 4 for associations with Glx/GABA,  $n$ -FDR: 8 for associations with 'true' CPM effects). Using 3 additional Spearman correlations, associations of Glx/GABA with indicators of psychological distress in the CLBP

patients, i.e. PCS and HADS anxiety and depression scores, were explored without multiple comparison correction due to the exploratory nature of this analysis.

## **Confounding factors**

The statistical analyses of proportional differences between CLBP patients and controls regarding menstrual cycle phases and pain-relevant medication intake, and associated potential influences on Glx/GABA or the parallel CPM effects are described in the Supplementary Methods M6.

## **Data availability**

Data of participants who gave informed consent for further use of their anonymized data will be made available upon request.

## **Results**

For all linear models and Welch's t-tests, results with and without influential cases are presented in Supplementary Table 2.

## **Participants**

Out of 83 recruited participants (48 CLBP patients, 35 controls), 3 (CLBP patients) cancelled prior to the first session, 3 (2 CLBP patients, 1 control) were excluded due to a suspected neurological or psychiatric disorder and 1 (control) discontinued the scanning session due to discomfort. Five additional participants (2 CLBP patients, 3 controls) were excluded due to artefacts in the MR spectra (Supplementary Fig. 1). One additional control was excluded due to insufficient SNR.

The demographics of the final sample (41 CLBP patients, 29 controls) are described in Table 1.



**Table 1 Participant demographics and clinical characteristics.**

|                                                             | <b>CLBP patients<br/>(n = 41)</b> | <b>Controls<br/>(n = 29)</b> | <b>Test<br/>statistic</b> | <b>P</b>           | <b>Effect size</b> |
|-------------------------------------------------------------|-----------------------------------|------------------------------|---------------------------|--------------------|--------------------|
| Age [years]                                                 | 54 (41 - 65)                      | 47 (34 - 67)                 | W = 553                   | 0.625              | $r = 0.06$         |
| Sex (female:male) [n]                                       | 22:19                             | 17:12                        |                           | 0.810 <sup>a</sup> |                    |
| BMI [kg/m <sup>2</sup> ]                                    | 24.5 (3.47)                       | 23.3 (2.60)                  | $t = 1.5$                 | 0.128              | $d = -0.37$        |
| PCS                                                         | 11 (5 - 22)                       | 3 (0 - 8)                    | W = 267.5                 | <b>&lt;0.001</b>   | $r = 0.49$         |
| HADS anxiety                                                | 4 (2 - 7)                         | 3 (1 - 5)                    | W = 485.5                 | 0.193              | $r = 0.16$         |
| HADS depression                                             | 1 (0 - 2)                         | 3 (1 - 6)                    | W = 314                   | <b>&lt;0.001</b>   | $r = 0.41$         |
| Average clinical pain intensity over the past 4 weeks [NRS] | 4 (3 - 5)                         |                              |                           |                    |                    |
| Pain duration [months]                                      | 106 (17 - 205.25) <sup>b</sup>    |                              |                           |                    |                    |
| Spatial pain extent [%]                                     | 1.3 (0.5 - 2.2)                   |                              |                           |                    |                    |
| Within-MRS-session clinical pain [NRS]                      | 1.5 (0 - 4)                       |                              |                           |                    |                    |
| Within-CPM-session clinical pain [NRS]                      | 2 (0 - 4)                         |                              |                           |                    |                    |

Values are presented as mean (SD) for continuous variables and as median (interquartile range) for ordinal or non-normally distributed variables. W-statistics refer to Wilcoxon rank-sum tests and t-statistics to unpaired t-tests.

<sup>a</sup>Fisher's exact test.

<sup>b</sup>N = 40 due to 1 missing value (participant did not indicate month of pain onset).

## Magnetic resonance spectroscopy

Shimming quality (FWHM H<sub>2</sub>O) and SNR indicated high spectral quality in both cohorts (Table 2, Fig. 2B and C). All metabolites were detected with adequate accuracy, i.e. mean Cramér-Rao lower-bounds (CRLB) below 20% (Supplementary Table 3).

Glx/GABA was significantly lower in CLBP patients compared to controls (Table 2, Fig. 3A). This effect was driven by lower Glx as well as higher GABA in CLBP patients compared to controls (Table 2, Fig. 3B).

Sex had an influence on tCre and tCho in CLBP patients (significant 'cohort X sex' interactions; Supplementary Table 2) with highest concentrations observed in CLBP males. Additionally, tCre increased with age and tMI was higher in males (Supplementary Table 2). Otherwise, no metabolite differences were observed (Table 2). There were no differences in GM or CSF tissue fractions between the cohorts (Table 2). However, CSF tissue fractions increased with age in CLBP patients ( $\rho = 0.73$ ,  $P < 0.001$ ) but not in controls ( $\rho = 0.04$ ,  $P = 0.831$ ). Further, CLBP patients presented with lower WM tissue fractions compared to controls (Table 2).

Observed group differences in Glx or GABA were not driven by variations in GM or WM tissue fractions because within controls, neither Glx nor GABA correlated with GM (Glx:  $r = -0.23$ ,  $P = 0.224$ ; GABA:  $r = 0.04$ ,  $P = 0.822$ ) or WM tissue fractions (Glx:  $r = 0.32$ ,  $P = 0.091$ , GABA:  $r = 0.10$ ,  $P = 0.617$ ).

**Table 2 MRS outcomes, experimental pressure pain sensitivity and CPM effects.**

|                                               | CLBP patients<br>(n = 41)                 | Controls<br>(n = 29)                 | n-IC           | Test<br>statistic           | P                        | Effect<br>size        |
|-----------------------------------------------|-------------------------------------------|--------------------------------------|----------------|-----------------------------|--------------------------|-----------------------|
| <b>MRS outcomes</b>                           |                                           |                                      |                |                             |                          |                       |
| SNR                                           | 19 (18 - 19)                              | 18 (17 - 21)                         |                | W = 567.5                   | 0.748                    | r = 0.04              |
| FWHM H <sub>2</sub> O [Hz]                    | 5.4 (0.91)                                | 5.4 (0.70)                           |                | t = 0.3                     | 0.737                    | d = 0.08              |
| FWHM NAA [Hz]                                 | 4.3 (3.96 - 4.85)                         | 4.9 (3.96 - 4.85)                    |                | W = 545                     | 0.561                    | r = 0.07              |
| Glx/GABA                                      | 4.0 (1.05)                                | 4.9 (1.17)                           | 1              | F = 10.7                    | <b>0.002</b>             | η <sup>2</sup> = 0.14 |
| Glx [mmol/kg]                                 | 8.9 (1.34)                                | 9.9 (1.57)                           | 4              | F = 8.0                     | <b>0.012<sup>a</sup></b> | η <sup>2</sup> = 0.11 |
| GABA [mmol/kg]                                | 2.4 (0.67)                                | 2.1 (0.45)                           | 1 <sup>†</sup> | F = 4.5                     | <b>0.038<sup>a</sup></b> | d = 0.46              |
| tCre [mmol/kg]                                | 6.5 (0.57)                                | 6.6 (0.46)                           | 4              | not meaningful <sup>b</sup> |                          |                       |
| tCho [mmol/kg]                                | 2.2 (0.24)                                | 2.2 (0.18)                           | 3              | not meaningful <sup>b</sup> |                          |                       |
| tml [mmol/kg]                                 | 8.9 (0.91)                                | 9.0 (1.03)                           |                | F = 0.2                     | 0.661                    | η <sup>2</sup> = 0.00 |
| tNAA [mmol/kg]                                | 9.1 (1.16)                                | 9.0 (0.87)                           |                | F = 0.2                     | 0.654                    | η <sup>2</sup> = 0.00 |
| GM [% of VOI]                                 | 52.7 (5.19)                               | 50.2 (5.04)                          | 2 <sup>†</sup> | F = 4.0                     | 0.050                    | η <sup>2</sup> = 0.06 |
| WM [% of VOI]                                 | 41.2 (7.20)                               | 45.0 (6.0)                           | 2              | F = 5.4                     | <b>0.024</b>             | η <sup>2</sup> = 0.07 |
| CSF [% of VOI]                                | 6.0 (3.9)                                 | 4.8 (2.5)                            | 3              | W = 510                     | 0.312                    | r = 0.12              |
| <b>Experimental pressure pain sensitivity</b> |                                           |                                      |                |                             |                          |                       |
| PPT LB [kg/cm <sup>2</sup> ]                  | 5.7 (2.76)                                | 6.1 (2.51)                           |                | t = -0.61                   | 0.539                    | d = 0.15              |
| PPT Hand [kg/cm <sup>2</sup> ]                | 4.0 (2.97 - 5.20)                         | 3.8 (2.83 - 4.90)                    |                | W = 553                     | 0.625                    | r = 0.06              |
| <b>CPM effects</b>                            |                                           |                                      |                |                             |                          |                       |
|                                               | <b>CPM-SHAM<br/>Controls<br/>(n = 29)</b> | <b>CPM<br/>Controls<br/>(n = 29)</b> |                |                             |                          |                       |
| PPT before Hand [kg/cm <sup>2</sup> ]         | 4.4 (1.75)                                | 4.2 (1.59)                           |                |                             |                          |                       |
| PPT during Hand [kg/cm <sup>2</sup> ]         | 4.5 (1.49)                                | 5.1 (1.84)                           |                |                             |                          |                       |
| PPT after Hand [kg/cm <sup>2</sup> ]          | 4.6 (1.63)                                | 4.6 (1.49)                           |                |                             |                          |                       |
| ΔPPT parallel Hand [kg/cm <sup>2</sup> ]      | -0.02 (1.04)                              | -0.9 (1.21)                          | 9              | t <sup>ph</sup> = -2.8      | <b>0.010</b>             |                       |
| ΔPPT sequential Hand [kg/cm <sup>2</sup> ]    | -0.1 (0.96)                               | -0.4 (0.94)                          | 9              | t <sup>ph</sup> = -0.9      | 0.591                    |                       |
| ΔPPT parallel Hand [%]                        | -5.4 (25.15)                              | -27.6 (33.40)                        |                |                             |                          |                       |
| ΔPPT sequential Hand [%]                      | -7.1 (26.99)                              | -14.7 (26.39)                        |                |                             |                          |                       |
|                                               | <b>CLBP patients<br/>(n = 41)</b>         | <b>Controls<br/>(n = 29)</b>         |                |                             |                          |                       |
| Cold-water bath LB<br>pain intensity [NRS]    | 9 (7 - 10)                                | 8 (7 - 9)                            |                | W = 530                     | 0.438                    | r = 0.09              |
| Cold-water bath Hand<br>pain intensity [NRS]  | 8 (6 - 9)                                 | 8 (7 - 9)                            |                | W = 572                     | 0.791                    | r = 0.03              |
| PPT before LB [kg/cm <sup>2</sup> ]           | 5.6 (2.77)                                | 6.3 (2.38)                           |                |                             |                          |                       |
| PPT during LB [kg/cm <sup>2</sup> ]           | 6.9 (2.96)                                | 8.0 (2.27)                           |                |                             |                          |                       |
| CPM ΔPPT parallel LB [kg/cm <sup>2</sup> ]    | <b>-1.2 (1.37)***</b>                     | <b>-1.6 (1.55)***</b>                |                |                             |                          |                       |
| CPM ΔPPT parallel LB [%]                      | -25.8 (33.25)                             | -33.0 (34.15)                        | 4              | F = 0.75                    | 0.388 <sup>a</sup>       | η <sup>2</sup> = 0.01 |
| PPT before Hand [kg/cm <sup>2</sup> ]         | 4.5 (2.09)                                | 4.2 (1.59)                           |                |                             |                          |                       |
| PPT during Hand [kg/cm <sup>2</sup> ]         | 5.0 (2.0)                                 | 5.1 (1.84)                           |                |                             |                          |                       |
| CPM ΔPPT parallel Hand [kg/cm <sup>2</sup> ]  | <b>-0.5 (0.95)**</b>                      | <b>-0.9 (1.21)***</b>                |                |                             |                          |                       |
| CPM ΔPPT parallel Hand [%]                    | -16.9 (24.83)                             | -27.6 (33.40)                        | 3              | F = 2.3                     | 0.274 <sup>a</sup>       | η <sup>2</sup> = 0.03 |
| CPM-inhibitors LB [%]                         | 47.5                                      | 53.5                                 |                |                             |                          |                       |
| CPM-facilitators LB [%]                       | 7.5                                       | 3.5                                  |                |                             | 0.794 <sup>c</sup>       |                       |
| CPM-non-responders LB [%]                     | 45                                        | 43                                   |                |                             |                          |                       |
| CPM-inhibitors Hand [%]                       | 33                                        | 56                                   |                |                             |                          |                       |
| CPM-facilitators Hand [%]                     | 3                                         | 7                                    |                |                             | 0.142 <sup>c</sup>       |                       |
| CPM-non-responders Hand [%]                   | 64                                        | 37                                   |                |                             |                          |                       |

Values are presented as mean (SD) for continuous variables and as median (interquartile range) for ordinal or not normally distributed variables. n-IC indicates the number of identified influential cases in the respective model. n-IC<sup>†</sup> indicates that removal of influential cases changed the statistical inference of the model. W-statistics refer to Wilcoxon rank-sum tests, t-statistics to unpaired t-tests or Sidak-corrected post-hoc tests (t<sup>ph</sup>) and F-statistics to linear models or Welch's test for GABA. η<sup>2</sup> values refer to partial η<sup>2</sup>s. Number of missing values for each variable are reported in Supplementary Table 6. LB: lower back.

<sup>a</sup>FDR-corrected for n = 2 tests.

<sup>b</sup>Due to the presence of a significant 'cohort X sex' interaction effect.

<sup>c</sup>Fisher's exact test with FDR-correction for n = 2 tests.

\*\*Statistically significant within-group CPM effect with P < 0.01, FDR-corrected for n = 2 tests

\*\*\*Statistically significant within-group CPM effect with P < 0.001, FDR-corrected for n = 2 tests

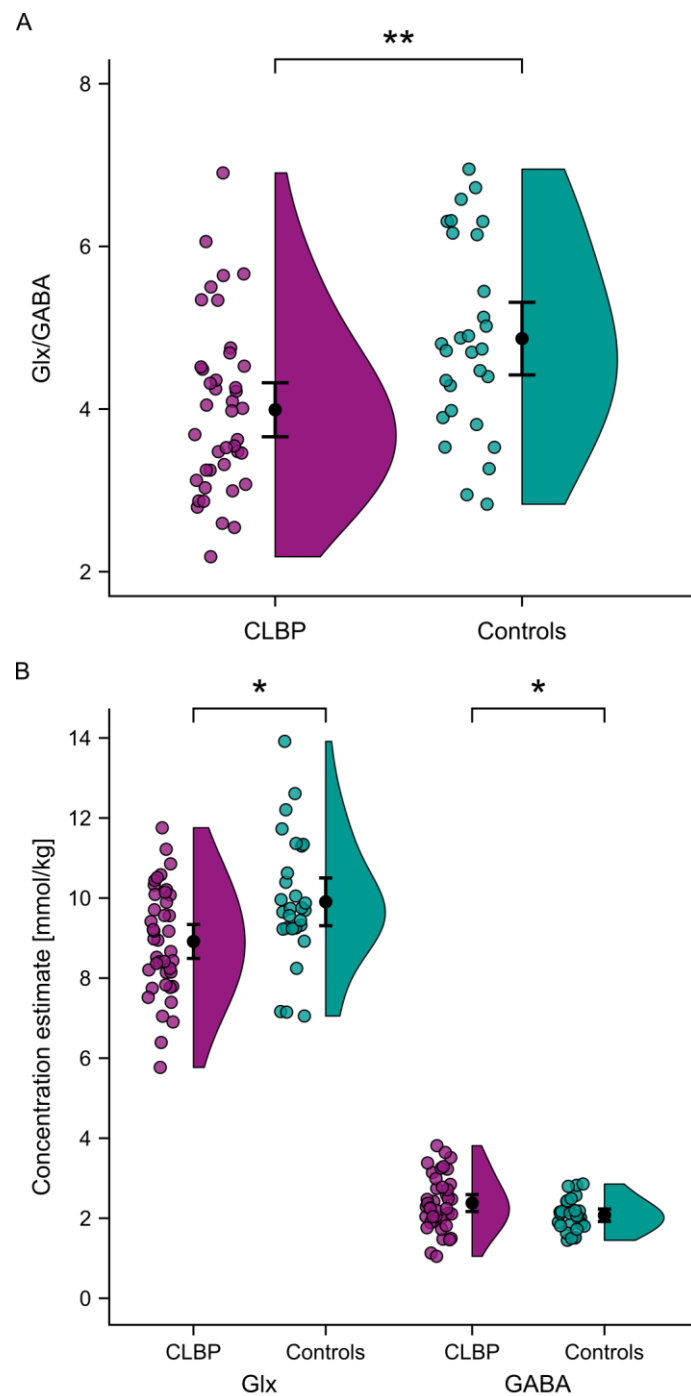

**Figure 3 Lower Glx/GABA in CLBP patients driven by decreased Glx and increased GABA.** The raincloud plots<sup>144</sup> show the raw data (coloured dots), means and 95% confidence intervals (black dots and bars) and probability distributions (vertical "clouds") of Glx/GABA (A) and Glx and GABA separately (B) for CLBP patients (purple) and controls (teal). \* $P < 0.05$ , \*\* $P < 0.01$ .

Qualitatively similar cohort effects were observed using the literature-based water signals (Supplementary Table 4).

## Conditioned pain modulation

Cold water baths induced moderate to intense pain (Table 2). Six participants (5 CLBP, 1 control) reported low pain (NRS 1-3) in 1 or 2 cold water baths. Seven participants (5 CLBP, 2 controls) did not tolerate the full 2 min of 1 or 2 cold water baths. Two controls reported pain (NRS 1 and 2) during the ambient temperature water bath. For 1 CLBP patient and the respective matched control, CPM and experimental pressure pain sensitivity were assessed at the upper arm as control area because of scarring at the CLBP patient's hand. These cases did not have an influence on the results.

First testing for the presence of a 'true' CPM effect beyond repeated-measures effects at the hand of the controls revealed a significant difference between the CPM and the CPM-SHAM effect on the PPTs ( $F = 4.2$ ,  $P = 0.017$ ). Inhibition of PPTs was stronger during CPM compared to during CPM-SHAM indicating a 'true' parallel CPM effect (Table 2, Fig. 4A). There was no difference in PPT changes after CPM compared to after CPM-SHAM (Table 2, Fig. 4A).

This inhibitory parallel CPM effect on PPTs was significant in both cohorts at the lower back (CLBP:  $F = 31.4$ ,  $P < 0.001$ ,  $n$ -IC: 0, controls:  $F = 30.6$ ,  $P < 0.001$ ,  $n$ -IC: 1) and hand (CLBP:  $F = 11.2$ ,  $P = 0.002$ ,  $n$ -IC: 2, controls:  $F = 13.8$ ,  $P < 0.001$ ,  $n$ -IC: 2) (Table 2, Fig. 4B). Parallel CPM effects were not different between CLBP patients and controls (Table 2, Fig. 4C).

The SEM for PPTs was 12.4%. There was no difference in the proportions of CPM-inhibitors, CPM-facilitators and CPM-non-responders between the cohorts (Table 2).

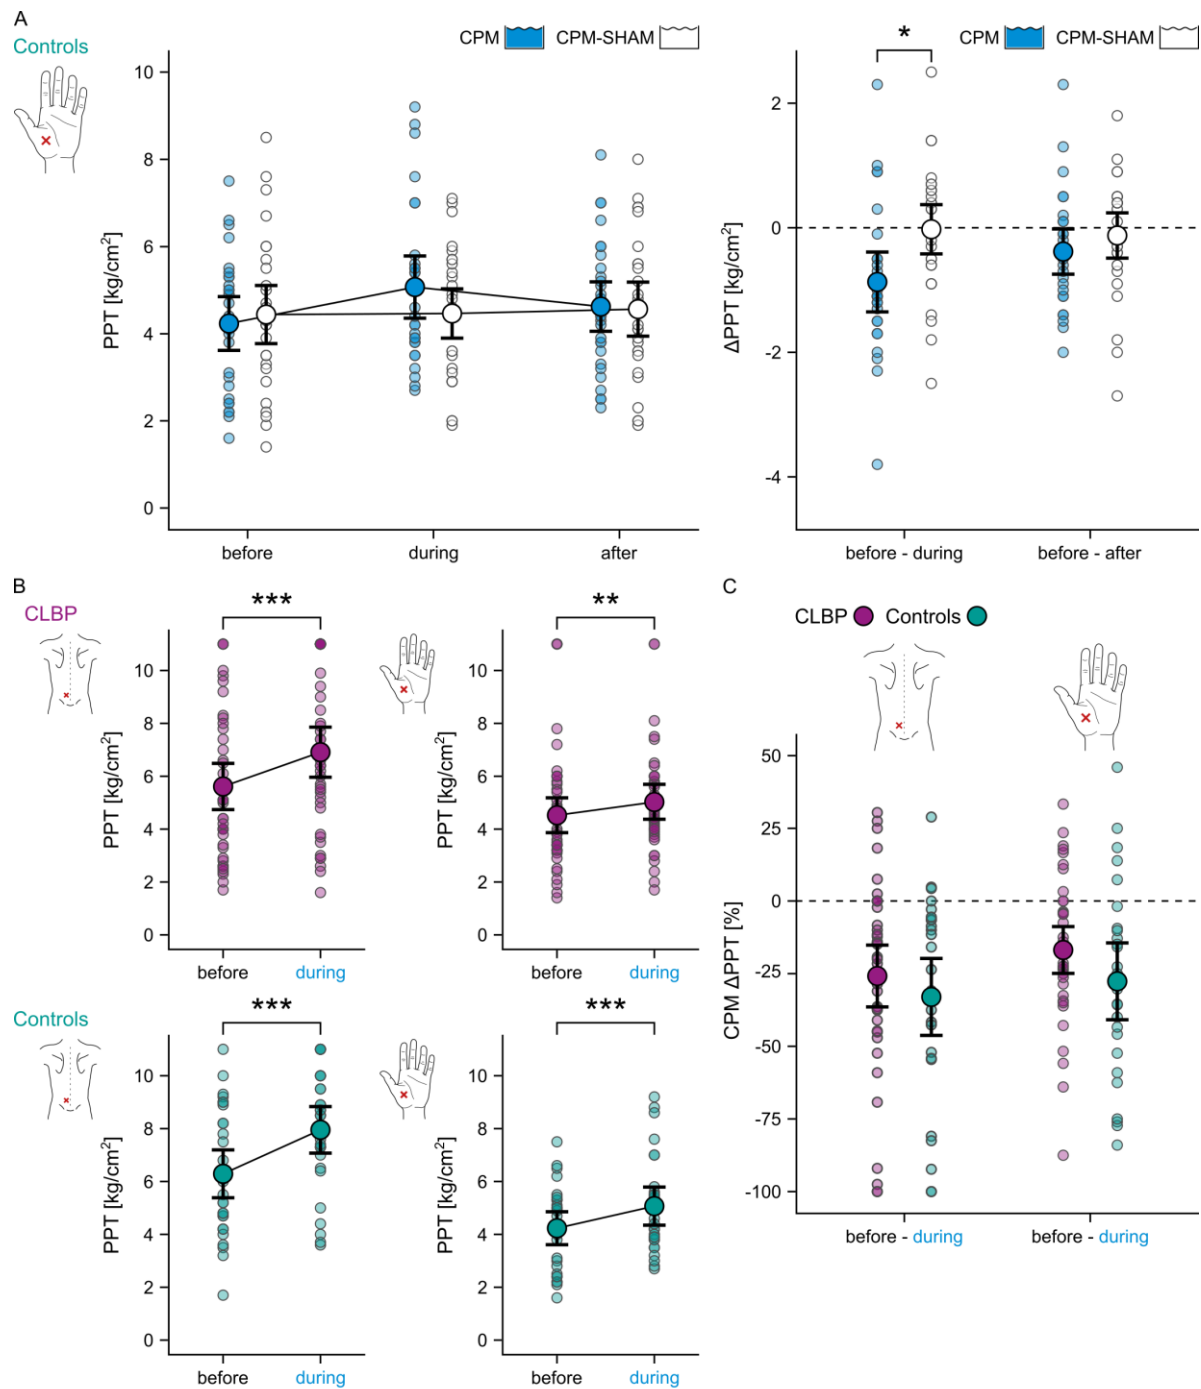

**Figure 4 Inhibitory CPM effects on PPTs in CLBP patients and pain-free controls.** (A) PPT changes in controls in response to the CPM (blue) and the CPM-SHAM (white) paradigm performed at the non-dominant hand (pain-free control area). Data are presented as PPT values at each timepoint of the 2 paradigms (left panel) and as absolute parallel (PPT before - PPT during) and sequential (PPT before - PPT after) PPT changes in response to the 2 paradigms ( $\Delta$ PPT; right panel). (B) PPT values before and during the cold water bath reflecting parallel CPM effects at the lower back (most painful area) and at the non-dominant hand of CLBP patients (purple) and controls (turquoise). (C) Group comparison of relative parallel CPM effects (CPM  $\Delta$ PPT), i.e.  $([PPT \text{ before} - PPT \text{ during}] / PPT \text{ before}) * 100$ , at the lower back and at the non-dominant hand. Negative absolute and relative  $\Delta$ PPTs reflect inhibitory effects, positive values reflect facilitatory effects. The dotted line depicts a null effect. The plots represent the raw data (coloured semi-transparent dots), means (coloured dots) and 95% confidence intervals (black bars). \* $P < 0.05$ , \*\* $P < 0.01$ , \*\*\* $P < 0.001$ .

## **Associations of Glx/GABA with CPM effects and experimental pressure pain sensitivity**

Associations of Glx/GABA with parallel CPM effects at the hand differed between the cohorts ('true' CPM effect X cohort' interaction:  $F = 5.4$ ,  $P = 0.046$ , *partial*  $\eta^2 = 0.08$ , *n-IC*: 1<sup>†</sup>). In controls, lower Glx/GABA was associated with larger CPM effects, but this association was not observed in CLBP patients (Fig. 5A). No cohort differences were observed for associations of Glx/GABA with parallel CPM effects at the lower back (Supplementary Table 2, Fig. 5A). Associations of Glx/GABA with PPTs differed between the cohorts at the lower back *and* hand ('experimental pressure pain sensitivity X cohort' interaction: lower back:  $F = 9.0$ ,  $P = 0.004$ , *partial*  $\eta^2 = 0.12$ , *n-IC*: 2; hand:  $F = 12.1$ ,  $P = 0.002$ , *partial*  $\eta^2 = 0.16$ , *n-IC*: 2). Again, controls showed associations (lower Glx/GABA correlated with lower PPTs) that were not present in CLBP patients (Fig. 5B).

Parallel CPM effects depended on experimental pressure pain sensitivity, i.e. controls showed significantly smaller CPM effects with increasing PPTs, but exclusively at the hand ( $\rho = 0.63$ ,  $P < 0.001$ ; lower back:  $\rho = 0.22$ ,  $P = 0.545$ ).

## **Associations of Glx/GABA and CPM effects with clinical characteristics of CLBP patients**

Glx/GABA was not associated with average clinical pain intensities over the past 4 weeks, pain duration, spatial pain extent or within-MRS-session clinical pain (Supplementary Table 5). Smaller parallel CPM effects at the hand were observed for CLBP patients with higher average clinical pain intensities over the past 4 weeks ( $\rho = 0.54$ ,  $P = 0.003$ ) but not with higher within-CPM-session clinical pain ( $\rho = 0.22$ ,  $P = 0.225$ ) (Fig. 5C). No other associations between parallel CPM effects and clinical characteristics were observed (Supplementary Table 5). A statistical trend was observed for associations between Glx/GABA and PCS ( $\rho = -0.29$ ,  $P = 0.066$ ) and HADS anxiety scores ( $\rho = -0.29$ ,  $P = 0.061$ ). Glx/GABA was not related to HADS depression scores ( $\rho = -0.19$ ,  $P = 0.244$ ).

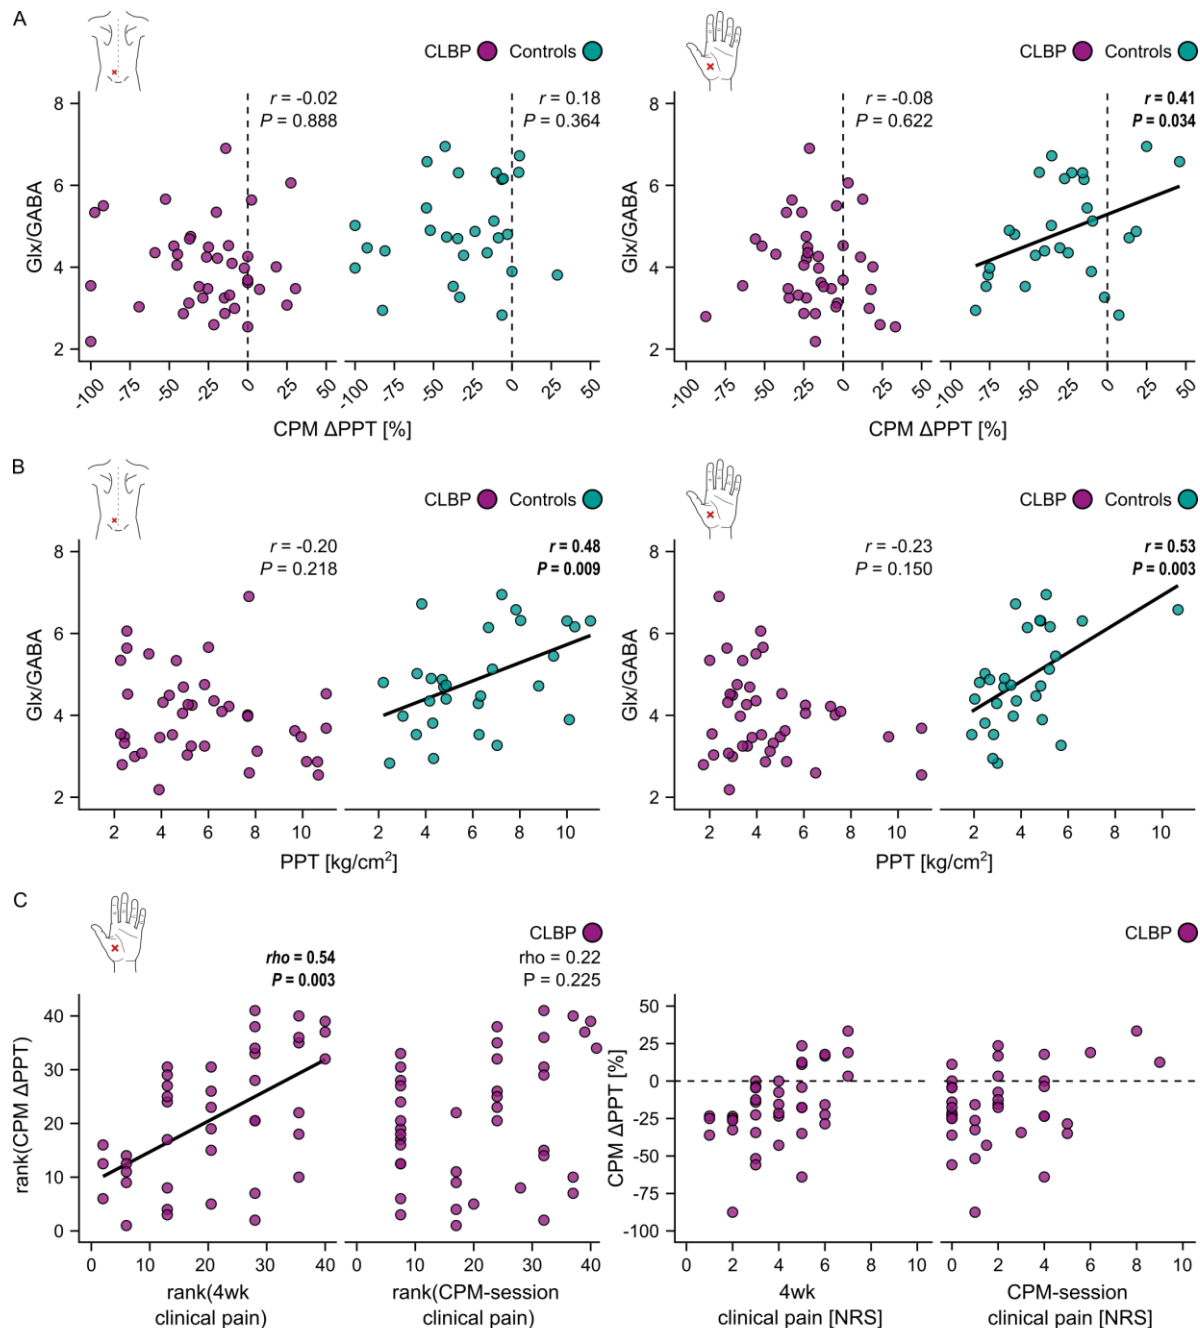

**Figure 5 Glx/GABA- and CPM effect-related associations.** (A) and (B) visualize the results of the linear models testing cohort differences in associations of Glx/GABA with 'true' CPM effects and experimental pressure pain sensitivity. Pearson correlations reflect the models' interaction effects of interest, i.e. 'true' CPM effect X cohort' (significant for the non-dominant hand) and 'experimental pressure pain sensitivity X cohort' (significant for the lower back and the non-dominant hand). (A) shows Pearson correlations between Glx/GABA and relative parallel CPM effects (CPM  $\Delta$ PPT) and (B) shows Pearson correlations between Glx/GABA and experimental pressure pain sensitivity, i.e. PPTs, of CLBP patients (purple) and controls (turquoise) at the lower back (most painful area) and at the non-dominant hand (pain-free control area). (C) Spearman correlations between relative parallel CPM effects (CPM  $\Delta$ PPT) and average clinical pain intensities over the past 4 weeks (4wk clinical pain), i.e. 'trait' pain, and within-CPM-session clinical pain (CPM-session clinical pain), i.e. 'state' pain. Left panels show ranked data representative of Spearman correlations. To help with interpretability, the raw data is shown in the right panels. Negative relative CPM  $\Delta$ PPTs reflect inhibitory



CPM effects, positive relative CPM  $\Delta$ PPTs reflect facilitatory CPM effects. The dotted line depicts a null CPM effect.

## Confounding factors

Neither menstrual cycle phase nor pain medication intake had an influence on Glx/GABA or parallel CPM effects in either area (Supplementary Results R1).

## Discussion

This study presents evidence for PAG dysfunction in patients with CLBP. Firstly, CLBP patients showed a lower Glx/GABA ratio, i.e. a lower excitatory/inhibitory tone, in the PAG compared to pain-free controls, driven by decreased Glx *and* increased GABA. Secondly, while controls showed a link between Glx/GABA and experimental pressure pain sensitivity, these associations were disrupted in the patients. Additionally, CLBP patients with more severe clinical pain presented with reduced CPM capacities.

### Lower Glx/GABA in the PAG of CLBP patients

Growing evidence supports the presence of Glx and/or GABA imbalances across chronic pain conditions.<sup>36</sup> For Glx and GABA, the investigated brain region matters regarding whether metabolite increases or decreases would be expected to contribute to enhanced pain sensitivity. In the PAG, a higher inhibitory or reduced excitatory tone might impede effective descending pain inhibition. This concept is supported by the observation of increased presynaptic GABA release and reduced glutamatergic neurotransmission in the PAG in animal models of chronic neuropathic pain.<sup>40,41</sup> The present study is the first to report similar changes in the PAG of patients with chronic pain. Intriguingly, the lower Glx/GABA in the PAG of CLBP patients compared to controls was due to a Glx decrease *and* a GABA increase. An earlier PAG <sup>1</sup>H-MRS study reported Glx changes in the opposite direction in patients with episodic and chronic migraine.<sup>45</sup> This discrepancy could theoretically be due to different pathomechanisms of migraine and CLBP, involving different sensory afferents, i.e. trigeminal or spinal afferents. However, both afferent types are similarly connected to the PAG, i.e. they terminate in the lateral PAG<sup>87,88</sup> and are inhibited upon PAG activation.<sup>89-97</sup> Therefore, a methodological explanation is more plausible, for example the larger VOI size in the migraine study

encompassing additional structures such as the red nucleus and parts of the substantia nigra.<sup>45</sup> These regions show alterations in chronic migraine patients<sup>98,99</sup> and thus, might have contributed to the increased Glx in migraine patients.<sup>45</sup> Other PAG <sup>1</sup>H-MRS studies did not describe differences in Glx or GABA between patients and controls.<sup>42-44</sup>

The remaining metabolites did not show group differences except for the higher tCre and tCho in male CLBP patients. In addition, mI was increased in males compared to females. These findings are likely explained by the levels of all 3 metabolites increasing with age,<sup>100,101</sup> (as also observed in the present study for tCre) and higher levels in males,<sup>102,103</sup> because CLBP male patients were the oldest subgroup.

For <sup>1</sup>H-MRS interpretation, consideration of brain tissue fractions within the VOI is crucial because metabolite concentrations are tissue-dependent.<sup>104,105</sup> Here, lower WM tissue fractions and higher CSF tissue fractions with increasing age were observed in CLBP patients. This pattern resembles age-related degenerative processes<sup>106</sup> and might add to the notion of accelerated brain aging in chronic pain.<sup>107,108</sup> However, it can be ruled out that these factors drove the observed results in Glx or GABA because (1) CSF tissue fractions were accounted for in the metabolite concentration calculations, (2) lower WM tissue fractions would result in lower choline concentrations<sup>109</sup> which was not observed in the CLBP patients, and (3) neither Glx nor GABA were related to WM tissue fractions in the controls. Lastly, Glx and GABA are predominantly present in GM<sup>105,110</sup> and even if WM tissue fractions had an influence, Glx and GABA would change in the same and not opposite direction.

OVERPRESS and voxel-based flip angle calibration minimize 2 limitations of conventional PRESS sequences, namely chemical shift displacement artifacts and the susceptibility to B<sub>1</sub> inhomogeneities. A remaining limitation concerns reliable GABA detection because GABA's signal overlaps with resonances from other metabolites. In the present study, adequate CRLBs of GABA were detected (absolute median: 58.9 I.U., relative median: 16.5 %) and the measured concentrations in controls were similar to expected concentrations in human brain tissue.<sup>111,112</sup> Nevertheless, the observed cohort difference in GABA could include influences from molecules with similar resonance frequencies to GABA. MEScher-GARwood PRESS<sup>113</sup> sequences are more GABA-specific but unsuitable for the PAG because they require VOI sizes of approximately 30x30x30 mm<sup>3114</sup> and are highly susceptible to frequency drifts.<sup>115</sup>

## **Reduced CPM capacities in CLBP patients with more severe clinical pain**

One strength of the present study is the use of a CPM-SHAM paradigm. This allowed for the detection of 'true' CPM effects<sup>72,85</sup> which were present for PPTs assessed in parallel to the cold water bath. The lack of a 'true' sequential CPM effect can be explained by sequential CPM effects being smaller compared to parallel CPM effects<sup>116,117</sup> due to decreasing CPM effects after cessation of the CS<sup>118</sup> as well as distraction effects contributing to parallel CPM effects.<sup>84</sup> Nevertheless, the present results support the combination of PPT as test stimulus and a cold water bath as CS as robust CPM paradigm.<sup>69,70</sup>

The observed average 'true' parallel CPM effect magnitude of -30.3 % in the controls is consistent with existing reference values.<sup>119,120</sup> Impaired CPM effects were not observed in the CLBP patients, opposing the notion of deficient descending pain modulation in chronic pain conditions<sup>121</sup> and some previous reports in CLBP.<sup>122-124</sup> However, the recruited CLBP cohort presented with relatively low average clinical pain intensities over the past 4 weeks (median: NRS 4) and a meta-analysis indicated that CPM is only impaired in low back pain patients reporting high pain intensities (NRS >5).<sup>125</sup> This is substantiated by the observed association between higher average clinical pain intensities and smaller CPM effects at the hand. Importantly, this association of CPM was only observed with 'trait' pain but not with the potentially confounding 'state' pain, indicating that CPM capacities relate to clinical pain characteristics and not to the sheer fact of being in pain during the CPM paradigm. The lack of an association between CPM effects at the lower back and average clinical pain intensities was potentially due to the extra-segmental application of the CS, reported to induce larger CPM effects compared to segmentally applied CS.<sup>72,126-128</sup> A similar pattern was observed here (lower back: CLBP: -25.8 %, controls: -33.0 %; hand: CLBP: -16.9 %, controls: -27.6 %). These overall larger CPM effects might have masked pain-related CPM variations at the lower back. Alternatively, CLBP patients may have a functional, protective descending pain inhibition of their lower back, but reduced capacities for the rest of their body.<sup>129</sup>

## **Glx/GABA correlates with experimental pressure pain sensitivity in controls but not in CLBP patients**

Contrary to our hypothesis, lower Glx/GABA was associated with larger CPM effects at the hand of the controls, i.e. more pain inhibition. However, the observed associations of controls with lower Glx/GABA being more sensitive to experimental pressure pain, i.e. showing lower PPTs, in both areas support our hypothesis of lower Glx/GABA being associated with less pain inhibition or pain facilitation. Most likely, this contradictory result has a methodological explanation, i.e. that exclusively at the hand, controls with higher PPTs showed smaller *relative* CPM effects probably for mathematical reasons (e.g. PPT increase by 3 kg/cm<sup>2</sup> starting from 3 kg/cm<sup>2</sup> = 100% increase vs. starting from 6 kg/cm<sup>2</sup> = 50% increase) and due to the applied safety cut-off of 10 kg/cm<sup>2</sup>. At the lower back, where PPTs were higher compared to the hand and where no correlation between PPTs and CPM effects was present, Glx/GABA still correlated with the PPTs, but not with the CPM effects. Thus, Glx/GABA in the PAG might rather relate to experimental pressure pain sensitivity than to CPM effects.

DNIC are preserved after lesioning the PAG<sup>130,131</sup> and therefore, PAG function might not directly relate to CPM effects. Key roles for DNIC have been shown for medullary structures such as the subnucleus reticularis dorsalis<sup>132,133</sup> or the nucleus raphe magnus.<sup>134</sup> Still, the PAG has modulatory effects on DNIC<sup>135</sup> and is involved in RVM-driven descending (tonic) pain inhibition.<sup>136</sup> Tonic descending pain inhibition has been shown to be particularly strong for deep tissue afferents.<sup>137,138</sup> Given this evidence, the present results might reflect a stronger tonic PAG-driven descending inhibition of deep tissue afferents in pain-free individuals with higher Glx/GABA.

CLBP patients did not show associations between Glx/GABA and experimental pressure pain sensitivity and thus, their tonic PAG-driven descending inhibition of deep tissue afferents might be dysregulated. Associations between PAG metabolites and descending pain inhibition have been suggested previously.<sup>44</sup> PAG dysregulation might arise from altered inputs from supratentorial brain regions (reviewed in<sup>4</sup>). In chronic pain, a particularly relevant region with PAG connections is the amygdala.<sup>4</sup> Preclinical pain models show alterations in amygdala-PAG pathways<sup>139</sup> and increased amygdala activity resulting in decreased PAG activation via medial prefrontal cortex inhibition.<sup>140-142</sup> Interestingly, human functional connectivity studies have shown altered connectivity patterns between these regions and the PAG in patients with chronic pain (schematic summary in Fig. 6). A possible association of Glx/GABA with amygdala-related factors is supported by the correlational trends between Glx/GABA and PCS or HADS anxiety scores in CLBP patients observed in the current study. Further research is needed to

substantiate this hypothesis, for example studies integrating MRS, psychophysics and functional connectivity measures.

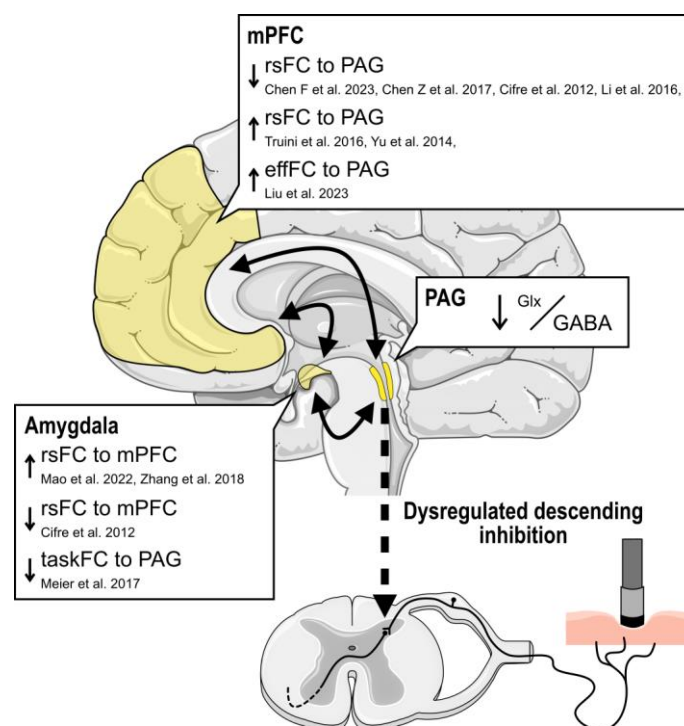

**Figure 6 Clinical evidence for altered amygdala-medial prefrontal cortex (mPFC)-PAG connectivity patterns in chronic pain and potential consequences for PAG-driven descending pain inhibition.** Summary of resting-state functional connectivity (rsFC) studies which found altered rsFC,<sup>145-152</sup> altered effective rsFC (effFC)<sup>154</sup> and altered task rsFC (during observation of harmful activities)<sup>154</sup> in the amygdala-mPFC-PAG circuit in chronic pain patients compared to pain-free controls. Altered supratentorial input to the PAG might be associated with dysregulated PAG metabolites and PAG-driven descending inhibition, such as the decreased Glx/GABA and the lacking association between Glx/GABA and experimental pressure pain sensitivity in CLBP patients observed in the present study. Here, the anterior cingulate cortex was considered to be part of the mPFC.<sup>155</sup> The schematic brain and spinal cord were adapted from Servier Medical Art ([smart.servier.com](https://smart.servier.com)).

## No further associations of Glx/GABA or CPM effects with clinical characteristics

Based on the present study, decreased Glx/GABA in CLBP appears to be independent of clinical pain intensity, pain duration and spatial pain extent. As discussed above, CPM effects were smaller in CLBP patients with more severe clinical pain. Previous reports documented reduced CPM capacities in CLBP patients with widespread pain.<sup>143</sup> In the present study, no association between CPM effects and spatial pain extent was observed. This might be due to the relatively low spatial pain extent in the present CLBP cohort; using the widespread pain

classification by Gerhardt and colleagues,<sup>143</sup> only 1 of the included CLBP patients would have been classified as having widespread pain.

In summary, this study extends preclinical evidence by demonstrating a lower excitatory/inhibitory tone, i.e. lower Glx/GABA, in the PAG of patients with CLBP. Additionally, it provides insights into how the excitatory/inhibitory balance in the PAG relates to pain sensitivity. Lower Glx/GABA was related to higher experimental pressure pain sensitivity in pain-free controls while CLBP patients lacked this association, indicating a dysregulated PAG function. Independent of PAG metabolites, CLBP patients with more severe clinical pain showed reduced CPM capacities. It remains to be investigated whether these alterations are CLBP-specific, related to etiologies including deep afferent-associated mechanisms, such as musculoskeletal conditions, or generally applicable to chronic pain states.

## **Acknowledgements**

We thank all participants who took part in the study. Additionally, we thank Lucas Tauschek, Simon Carisch, Madeleine Hau and Alexandros Guekos for their support during data acquisition.

## **Funding**

This study was funded by the Clinical Research Priority Program "Pain" of the University of Zurich. L. Sirucek is supported by the Theodor und Ida Herzog-Egli Stiftung. The authors express their gratitude to Emma Louise Kessler, MD, for her generous donation to the Zurich Institute of Forensic Medicine, University of Zurich, Switzerland.

## **Competing interests**

The authors report no competing interests.

## **Supplementary material**

Supplementary material is available online.

## References

1. Basbaum AI, Bautista DM, Scherrer G, Julius D. Cellular and molecular mechanisms of pain. *Cell* 2009;139(2):267-284.
2. Goldberg DS, McGee SJ. Pain as a global public health priority. *BMC Public Health* 2011;11:770.
3. Nielsen CS. Assessing the societal cost of chronic pain. *Scand J Pain* 2022;22(4):684-685.
4. Kuner R, Kuner T. Cellular Circuits in the Brain and Their Modulation in Acute and Chronic Pain. *Physiol Rev* 2021;101(1):213-258.
5. Fayed N, Andres E, Rojas G et al. Brain dysfunction in fibromyalgia and somatization disorder using proton magnetic resonance spectroscopy: a controlled study. *Acta Psychiatr Scand* 2012;126(2):115-125.
6. Fayed N, Andres E, Viguera L, Modrego PJ, Garcia-Campayo J. Higher glutamate+glutamine and reduction of N-acetylaspartate in posterior cingulate according to age range in patients with cognitive impairment and/or pain. *Acad Radiol* 2014;21(9):1211-1217.
7. Feraco P, Bacci A, Pedrabissi F et al. Metabolic abnormalities in pain-processing regions of patients with fibromyalgia: a 3T MR spectroscopy study. *AJNR Am J Neuroradiol* 2011;32(9):1585-1590.
8. Gonzalez de la Aleja J, Ramos A, Mato-Abad V et al. Higher glutamate to glutamine ratios in occipital regions in women with migraine during the interictal state. *Headache* 2013;53(2):365-375.
9. Gussew A, Rzanny R, Gullmar D, Scholle HC, Reichenbach JR. 1H-MR spectroscopic detection of metabolic changes in pain processing brain regions in the presence of non-specific chronic low back pain. *Neuroimage* 2011;54(2):1315-1323.
10. Harris RE, Sundgren PC, Craig AD et al. Elevated insular glutamate in fibromyalgia is associated with experimental pain. *Arthritis Rheum* 2009;60(10):3146-3152.
11. Ito T, Tanaka-Mizuno S, Iwashita N et al. Proton magnetic resonance spectroscopy assessment of metabolite status of the anterior cingulate cortex in chronic pain patients and healthy controls. *J Pain Res* 2017;10:287-293.
12. Kameda T, Fukui S, Tominaga R et al. Brain Metabolite Changes in the Anterior Cingulate Cortex of Chronic Low Back Pain Patients and Correlations Between Metabolites and Psychological State. *Clin J Pain* 2018;34(7):657-663.
13. Zielman R, Wijnen JP, Webb A et al. Cortical glutamate in migraine. *Brain* 2017;140(7):1859-1871.



14. Gerstner GE, Gracely RH, Deebajah A et al. Posterior insular molecular changes in myofascial pain. *J Dent Res* 2012;91(5):485-490.
15. Jung YH, Kim H, Jeon SY et al. Neurometabolite changes in patients with complex regional pain syndrome using magnetic resonance spectroscopy: a pilot study. *Neuroreport* 2019;30(2):108-112.
16. Prescott A, Becerra L, Pendse G et al. Excitatory neurotransmitters in brain regions in interictal migraine patients. *Mol Pain* 2009;5:34.
17. As-Sanie S, Kim J, Schmidt-Wilcke T et al. Functional Connectivity is Associated With Altered Brain Chemistry in Women With Endometriosis-Associated Chronic Pelvic Pain. *J Pain* 2016;17(1):1-13.
18. Bathel A, Schweizer L, Stude P et al. Increased thalamic glutamate/glutamine levels in migraineurs. *J Headache Pain* 2018;19(1):55.
19. Bednarska O, Icenhour A, Tapper S et al. Reduced excitatory neurotransmitter levels in anterior insulae are associated with abdominal pain in irritable bowel syndrome. *Pain* 2019;160(9):2004-2012.
20. Chan YM, Pitchaimuthu K, Wu QZ et al. Relating excitatory and inhibitory neurochemicals to visual perception: A magnetic resonance study of occipital cortex between migraine events. *PLoS One* 2019;14(7):e0208666.
21. Fayed N, Garcia-Campayo J, Magallon R et al. Localized 1H-NMR spectroscopy in patients with fibromyalgia: a controlled study of changes in cerebral glutamate/glutamine, inositol, choline, and N-acetylaspartate. *Arthritis Res Ther* 2010;12(4):R134.
22. Niddam DM, Tsai SY, Lu CL, Ko CW, Hsieh JC. Reduced hippocampal glutamate-glutamine levels in irritable bowel syndrome: preliminary findings using magnetic resonance spectroscopy. *Am J Gastroenterol* 2011;106(8):1503-1511.
23. Siniatchkin M, Sendacki M, Moeller F et al. Abnormal changes of synaptic excitability in migraine with aura. *Cereb Cortex* 2012;22(10):2207-2216.
24. Valdes M, Collado A, Bargallo N et al. Increased glutamate/glutamine compounds in the brains of patients with fibromyalgia: a magnetic resonance spectroscopy study. *Arthritis Rheum* 2010;62(6):1829-1836.
25. Widerstrom-Noga E, Pattany PM, Cruz-Almeida Y et al. Metabolite concentrations in the anterior cingulate cortex predict high neuropathic pain impact after spinal cord injury. *Pain* 2013;154(2):204-212.
26. Widerstrom-Noga E, Cruz-Almeida Y, Felix ER, Pattany PM. Somatosensory phenotype is associated with thalamic metabolites and pain intensity after spinal cord injury. *Pain* 2015;156(1):166-174.

27. Aguila ME, Lagopoulos J, Leaver AM et al. Elevated levels of GABA+ in migraine detected using (1) H-MRS. *NMR Biomed* 2015;28(7):890-897.
28. Bridge H, Stagg CJ, Near J et al. Altered neurochemical coupling in the occipital cortex in migraine with visual aura. *Cephalalgia* 2015;35(11):1025-1030.
29. Cruz-Almeida Y, Forbes M, Cohen RC et al. Brain gamma-aminobutyric acid, but not glutamine and glutamate levels are lower in older adults with chronic musculoskeletal pain: considerations by sex and brain location. *Pain Rep* 2021;6(3):e952.
30. Foerster BR, Petrou M, Edden RA et al. Reduced insular gamma-aminobutyric acid in fibromyalgia. *Arthritis Rheum* 2012;64(2):579-583.
31. Gustin SM, Wrigley PJ, Youssef AM et al. Thalamic activity and biochemical changes in individuals with neuropathic pain after spinal cord injury. *Pain* 2014;155(5):1027-1036.
32. Harper DE, Ichesco E, Schrepf A et al. Relationships between brain metabolite levels, functional connectivity, and negative mood in urologic chronic pelvic pain syndrome patients compared to controls: A MAPP research network study. *Neuroimage Clin* 2018;17:570-578.
33. Henderson LA, Peck CC, Petersen ET et al. Chronic pain: lost inhibition? *J Neurosci* 2013;33(17):7574-7582.
34. Peek AL, Leaver AM, Foster S et al. Increased GABA+ in People With Migraine, Headache, and Pain Conditions- A Potential Marker of Pain. *J Pain* 2021;22(12):1631-1645.
35. Wu X, Yuan J, Yang Y et al. Elevated GABA level in the precuneus and its association with pain intensity in patients with postherpetic neuralgia: An initial proton magnetic resonance spectroscopy study. *Eur J Radiol* 2022;157:110568.
36. Peek AL, Rebbeck T, Puts NA et al. Brain GABA and glutamate levels across pain conditions: A systematic literature review and meta-analysis of 1H-MRS studies using the MRS-Q quality assessment tool. *Neuroimage* 2020;210:116532.
37. Basbaum AI, Fields HL. Endogenous pain control systems: brainstem spinal pathways and endorphin circuitry. *Annu Rev Neurosci* 1984;7:309-338.
38. Heinricher MM, Ingram SL. The Brainstem and Nociceptive Modulation. *The Senses: A Comprehensive Reference* 2020.
39. Mitchell VA, Kawahara H, Vaughan CW. Neurotensin inhibition of GABAergic transmission via mGluR-induced endocannabinoid signalling in rat periaqueductal grey. *J Physiol* 2009;587(Pt 11):2511-2520.

40. Ho YC, Cheng JK, Chiou LC. Hypofunction of Glutamatergic Neurotransmission in the Periaqueductal Gray Contributes to Nerve-Injury-Induced Neuropathic Pain. *Journal of Neuroscience* 2013;33(18):7825-7836.
41. Hahm ET, Kim Y, Lee JJ, Cho YW. GABAergic synaptic response and its opioidergic modulation in periaqueductal gray neurons of rats with neuropathic pain. *BMC Neurosci* 2011;12:41.
42. Buonanotte F, Schurrer C, Carpinella M et al. [Alteration of the antinociceptive systems in chronic daily headaches]. *Rev Neurol* 2006;43(5):263-267.
43. Lai TH, Fuh JL, Lirng JF, Lin CP, Wang SJ. Brainstem 1H-MR spectroscopy in episodic and chronic migraine. *J Headache Pain* 2012;13(8):645-651.
44. Serrano-Munoz D, Galan-Arriero I, Avila-Martin G et al. Deficient Inhibitory Endogenous Pain Modulation Correlates With Periaqueductal Gray Matter Metabolites During Chronic Whiplash Injury. *Clin J Pain* 2019;35(8):668-677.
45. Wang W, Zhang X, Bai X et al. Gamma-aminobutyric acid and glutamate/glutamine levels in the dentate nucleus and periaqueductal gray with episodic and chronic migraine: a proton magnetic resonance spectroscopy study. *J Headache Pain* 2022;23(1):83.
46. Duvernoy HM. The human brain stem and cerebellum: surface, structure, vascularization, and three-dimensional sectional anatomy, with MRI: Springer Science & Business Media; 1995.
47. Brooks JC, Faull OK, Pattinson KT, Jenkinson M. Physiological noise in brainstem fMRI. *Front Hum Neurosci* 2013;7:623.
48. Edelstein WA, Glover GH, Hardy CJ, Redington RW. The intrinsic signal-to-noise ratio in NMR imaging. *Magn Reson Med* 1986;3(4):604-618.
49. Bottomley PA; Google Patents, assignee. Selective volume method for performing localized NMR spectroscopy. US Patent 4,480,228. October 30, 1984.
50. Ordidge R, Bendall M, Gordon R, Connelly A. Volume selection for in-vivo biological spectroscopy. *Magnetic resonance in biology and medicine* 1985:387-397.
51. Edden RA, Schar M, Hillis AE, Barker PB. Optimized detection of lactate at high fields using inner volume saturation. *Magn Reson Med* 2006;56(4):912-917.
52. Schulte RF, Henning A, Tsao J, Boesiger P, Pruessmann KP. Design of broadband RF pulses with polynomial-phase response. *J Magn Reson* 2007;186(2):167-175.
53. Wilson M, Andronesi O, Barker PB et al. Methodological consensus on clinical proton MRS of the brain: Review and recommendations. *Magn Reson Med* 2019;82(2):527-550.

54. Deelchand DK, Kantarci K, Oz G. Improved localization, spectral quality, and repeatability with advanced MRS methodology in the clinical setting. *Magn Reson Med* 2018;79(3):1241-1250.
55. Oz G, Deelchand DK, Wijnen JP et al. Advanced single voxel (1) H magnetic resonance spectroscopy techniques in humans: Experts' consensus recommendations. *NMR Biomed* 2020:e4236.
56. Near J, Edden R, Evans CJ et al. Frequency and phase drift correction of magnetic resonance spectroscopy data by spectral registration in the time domain. *Magn Reson Med* 2015;73(1):44-50.
57. Yarnitsky D, Arendt-Nielsen L, Bouhassira D et al. Recommendations on terminology and practice of psychophysical DNIC testing. *Eur J Pain* 2010;14(4):339.
58. Le Bars D, Dickenson AH, Besson JM. Diffuse noxious inhibitory controls (DNIC). I. Effects on dorsal horn convergent neurones in the rat. *Pain* 1979;6(3):283-304.
59. Le Bars D, Villanueva L, Bouhassira D, Willer JC. Diffuse noxious inhibitory controls (DNIC) in animals and in man. *Patol Fiziol Eksp Ter* 1992(4):55-65.
60. Near J, Harris AD, Juchem C et al. Preprocessing, analysis and quantification in single-voxel magnetic resonance spectroscopy: experts' consensus recommendations. *NMR Biomed* 2021;34(5):e4257.
61. Kreis R, Ernst T, Ross BD. Absolute Quantitation of Water and Metabolites in the Human Brain. II. Metabolite Concentrations. *Journal of Magnetic Resonance, Series B* 1993;102(1):9-19.
62. Ashburner J, Barnes G, Chen C et al. SPM12 Manual. Functional Imaging Laboratory, Institute of Neurology 2021.
63. Simpson R, Devenyi GA, Jezzard P, Hennessy TJ, Near J. Advanced processing and simulation of MRS data using the FID appliance (FID-A)-An open source, MATLAB-based toolkit. *Magn Reson Med* 2017;77(1):23-33.
64. Leys C, Ley C, Klein O, Bernard P, Licata L. Detecting outliers: Do not use standard deviation around the mean, use absolute deviation around the median. *Journal of Experimental Social Psychology* 2013;49:764-766.
65. Provencher SW. Estimation of metabolite concentrations from localized in vivo proton NMR spectra. *Magn Reson Med* 1993;30(6):672-679.
66. Wright PJ, Mouglin OE, Totman JJ et al. Water proton T1 measurements in brain tissue at 7, 3, and 1.5 T using IR-EPI, IR-TSE, and MPRAGE: results and optimization. *MAGMA* 2008;21(1-2):121-130.
67. Mejia AF, Sweeney EM, Dewey B et al. Statistical estimation of T1 relaxation times using conventional magnetic resonance imaging. *Neuroimage* 2016;133:176-188.

68. Thaler C, Hartrampf I, Stellmann JP et al. T1 Relaxation Times in the Cortex and Thalamus Are Associated With Working Memory and Information Processing Speed in Patients With Multiple Sclerosis. *Front Neurol* 2021;12:789812.
69. Nuwailati R, Bobos P, Drangsholt M, Curatolo M. Reliability of conditioned pain modulation in healthy individuals and chronic pain patients: a systematic review and meta-analysis. *Scand J Pain* 2022;22(2):262-278.
70. Imai Y, Petersen KK, Morch CD, Arendt Nielsen L. Comparing test-retest reliability and magnitude of conditioned pain modulation using different combinations of test and conditioning stimuli. *Somatosens Mot Res* 2016;33(3-4):169-177.
71. Rolke R, Magerl W, Campbell KA et al. Quantitative sensory testing: a comprehensive protocol for clinical trials. *Eur J Pain* 2006;10(1):77-88.
72. Klyne DM, Schmid AB, Moseley GL, Sterling M, Hodges PW. Effect of types and anatomic arrangement of painful stimuli on conditioned pain modulation. *J Pain* 2015;16(2):176-185.
73. De Schoenmacker I, Mollo A, Scheuren PS et al. Central sensitization in CRPS patients with widespread pain: A cross-sectional study. *Pain Med* 2023.
74. Lutolf R, De Schoenmacker I, Rosner J et al. Anti- and Pro-Nociceptive mechanisms in neuropathic pain after human spinal cord injury. *Eur J Pain* 2022;26(10):2176-2187.
75. Lutolf R, Rosner J, Curt A, Hubli M. Indicators of central sensitization in chronic neuropathic pain after spinal cord injury. *Eur J Pain* 2022;26(10):2162-2175.
76. Rosner J, Lutolf R, Hostettler P et al. Assessment of neuropathic pain after spinal cord injury using quantitative pain drawings. *Spinal Cord* 2021;59(5):529-537.
77. Sullivan MJL, Bishop S, Pivik J. The Pain Catastrophizing Scale: Development and Validation. *Psychological Assessment* 1995;7(4):524-532.
78. Zigmond AS, Snaith RP. The hospital anxiety and depression scale. *Acta Psychiatr Scand* 1983;67(6):361-370.
79. RStudio Team (2020). RStudio: Integrated Development for R. RStudio, PBC, Boston.
80. TeamR RC. A Language and Environment for Statistical Computing [Internet] Vienna. Austria R Foundation for Statistical Computing 2013.
81. Cohen J. *Statistical power analysis for the behavioral sciences*: Routledge; 1988.
82. Cohen J. A power primer. *Psychol Bull* 1992;112(1):155-159.
83. Rights JD, Sterba SK. Quantifying explained variance in multilevel models: An integrative framework for defining R-squared measures. *Psychol Methods* 2019;24(3):309-338.
84. Yarnitsky D, Bouhassira D, Drewes AM et al. Recommendations on practice of conditioned pain modulation (CPM) testing. *Eur J Pain* 2015;19(6):805-806.

85. Kennedy DL, Kemp HI, Wu C, Ridout DA, Rice ASC. Determining Real Change in Conditioned Pain Modulation: A Repeated Measures Study in Healthy Volunteers. *J Pain* 2020;21(5-6):708-721.
86. Ceko M, Frangos E, Gracely J et al. Default mode network changes in fibromyalgia patients are largely dependent on current clinical pain. *Neuroimage* 2020;216:116877.
87. Blomqvist A, Craig A. Organization of spinal and trigeminal input to the PAG. The midbrain periaqueductal gray matter: functional, anatomical, and neurochemical organization 1991:345-363.
88. Wiberg M, Westman J, Blomqvist A. Somatosensory projection to the mesencephalon: an anatomical study in the monkey. *J Comp Neurol* 1987;264(1):92-117.
89. Knight YE, Goadsby PJ. The periaqueductal grey matter modulates trigeminovascular input: a role in migraine? *Neuroscience* 2001;106(4):793-800.
90. Hayashi H, Sumino R, Sessle BJ. Functional organization of trigeminal subnucleus interpolaris: nociceptive and innocuous afferent inputs, projections to thalamus, cerebellum, and spinal cord, and descending modulation from periaqueductal gray. *J Neurophysiol* 1984;51(5):890-905.
91. Figueiras R, Buno W, Jr., Garcia-Austt E, Delgado JM. Periaqueductal gray inhibition of trigeminal subnucleus caudalis unitary responses evoked by dentine and nonnoxious facial stimulation. *Exp Neurol* 1983;81(1):34-49.
92. Aimone LD, Jones SL, Gebhart GF. Stimulation-produced descending inhibition from the periaqueductal gray and nucleus raphe magnus in the rat: mediation by spinal monoamines but not opioids. *Pain* 1987;31(1):123-136.
93. Budai D, Harasawa I, Fields HL. Midbrain periaqueductal gray (PAG) inhibits nociceptive inputs to sacral dorsal horn nociceptive neurons through alpha2-adrenergic receptors. *J Neurophysiol* 1998;80(5):2244-2254.
94. Carstens E, Yokota T, Zimmermann M. Inhibition of spinal neuronal responses to noxious skin heating by stimulation of mesencephalic periaqueductal gray in the cat. *J Neurophysiol* 1979;42(2):558-568.
95. Gray BG, Dostrovsky JO. Descending inhibitory influences from periaqueductal gray, nucleus raphe magnus, and adjacent reticular formation. I. Effects on lumbar spinal cord nociceptive and nonnociceptive neurons. *J Neurophysiol* 1983;49(4):932-947.
96. Jones SL, Gebhart GF. Inhibition of spinal nociceptive transmission from the midbrain, pons and medulla in the rat: activation of descending inhibition by morphine, glutamate and electrical stimulation. *Brain Res* 1988;460(2):281-296.



97. Waters AJ, Lumb BM. Inhibitory effects evoked from both the lateral and ventrolateral periaqueductal grey are selective for the nociceptive responses of rat dorsal horn neurones. *Brain Res* 1997;752(1-2):239-249.
98. Kruit MC, Launer LJ, Overbosch J, van Buchem MA, Ferrari MD. Iron accumulation in deep brain nuclei in migraine: a population-based magnetic resonance imaging study. *Cephalalgia* 2009;29(3):351-359.
99. Welch KM, Nagesh V, Aurora SK, Gelman N. Periaqueductal gray matter dysfunction in migraine: cause or the burden of illness? *Headache* 2001;41(7):629-637.
100. Lind A, Boraxbekk CJ, Petersen ET et al. Regional Myo-Inositol, Creatine, and Choline Levels Are Higher at Older Age and Scale Negatively with Visuospatial Working Memory: A Cross-Sectional Proton MR Spectroscopy Study at 7 Tesla on Normal Cognitive Ageing. *J Neurosci* 2020;40(42):8149-8159.
101. Pfefferbaum A, Adalsteinsson E, Spielman D, Sullivan EV, Lim KO. In vivo spectroscopic quantification of the N-acetyl moiety, creatine, and choline from large volumes of brain gray and white matter: effects of normal aging. *Magn Reson Med* 1999;41(2):276-284.
102. Endres D, Tebartz van Elst L, Feige B et al. On the Effect of Sex on Prefrontal and Cerebellar Neurometabolites in Healthy Adults: An MRS Study. *Front Hum Neurosci* 2016;10:367.
103. Hadel S, Wirth C, Rapp M, Gallinat J, Schubert F. Effects of age and sex on the concentrations of glutamate and glutamine in the human brain. *J Magn Reson Imaging* 2013;38(6):1480-1487.
104. Baker EH, Basso G, Barker PB et al. Regional apparent metabolite concentrations in young adult brain measured by (1)H MR spectroscopy at 3 Tesla. *J Magn Reson Imaging* 2008;27(3):489-499.
105. McLean MA, Woermann FG, Barker GJ, Duncan JS. Quantitative analysis of short echo time (1)H-MRSI of cerebral gray and white matter. *Magn Reson Med* 2000;44(3):401-411.
106. Jernigan TL, Archibald SL, Fennema-Notestine C et al. Effects of age on tissues and regions of the cerebrum and cerebellum. *Neurobiol Aging* 2001;22(4):581-594.
107. Cruz-Almeida Y, Fillingim RB, Riley JL, 3rd et al. Chronic pain is associated with a brain aging biomarker in community-dwelling older adults. *Pain* 2019;160(5):1119-1130.
108. Kuchinad A, Schweinhardt P, Seminowicz DA et al. Accelerated brain gray matter loss in fibromyalgia patients: premature aging of the brain? *J Neurosci* 2007;27(15):4004-4007.



109. Tal A, Kirov, II, Grossman RI, Gonen O. The role of gray and white matter segmentation in quantitative proton MR spectroscopic imaging. *NMR Biomed* 2012;25(12):1392-1400.
110. Mikkelsen M, Singh KD, Breal JA, Linden DE, Evans CJ. Quantification of gamma-aminobutyric acid (GABA) in (1) H MRS volumes composed heterogeneously of grey and white matter. *NMR Biomed* 2016;29(11):1644-1655.
111. Govindaraju V, Young K, Maudsley AA. Proton NMR chemical shifts and coupling constants for brain metabolites. *NMR Biomed* 2000;13(3):129-153.
112. Weis J, Persson J, Frick A et al. GABA quantification in human anterior cingulate cortex. *PLoS One* 2021;16(1):e0240641.
113. Mescher M, Merkle H, Kirsch J, Garwood M, Gruetter R. Simultaneous in vivo spectral editing and water suppression. *NMR in Biomedicine* 1998;11(6):266-272.
114. Peek AL, Rebbeck TJ, Leaver AM et al. A comprehensive guide to MEGA-PRESS for GABA measurement. *Anal Biochem* 2023;669:115113.
115. Harris AD, Glaubitz B, Near J et al. Impact of frequency drift on gamma-aminobutyric acid-edited MR spectroscopy. *Magn Reson Med* 2014;72(4):941-948.
116. Pud D, Granovsky Y, Yarnitsky D. The methodology of experimentally induced diffuse noxious inhibitory control (DNIC)-like effect in humans. *Pain* 2009;144(1-2):16-19.
117. Sirucek L, Jutzeler CR, Rosner J et al. The Effect of Conditioned Pain Modulation on Tonic Heat Pain Assessed Using Participant-Controlled Temperature. *Pain Med* 2020;21(11):2839-2849.
118. Roby-Brami A, Bussel B, Willer JC, Le Bars D. An electrophysiological investigation into the pain-relieving effects of heterotopic nociceptive stimuli. Probable involvement of a supraspinal loop. *Brain* 1987;110 ( Pt 6):1497-1508.
119. Schliessbach J, Lutolf C, Streitberger K et al. Reference values of conditioned pain modulation. *Scand J Pain* 2019;19(2):279-286.
120. Skovbjerg S, Jorgensen T, Arendt-Nielsen L et al. Conditioned Pain Modulation and Pressure Pain Sensitivity in the Adult Danish General Population: The DanFunD Study. *J Pain* 2017;18(3):274-284.
121. Arendt-Nielsen L, Morlion B, Perrot S et al. Assessment and manifestation of central sensitisation across different chronic pain conditions. *Eur J Pain* 2018;22(2):216-241.
122. Correa JB, Costa LO, de Oliveira NT, Sluka KA, Liebano RE. Central sensitization and changes in conditioned pain modulation in people with chronic nonspecific low back pain: a case-control study. *Exp Brain Res* 2015;233(8):2391-2399.

123. Rabey M, Poon C, Wray J et al. Pro-nociceptive and anti-nociceptive effects of a conditioned pain modulation protocol in participants with chronic low back pain and healthy control subjects. *Man Ther* 2015;20(6):763-768.
124. Moreira LPC, Mendoza C, Barone M et al. Reduction in Pain Inhibitory Modulation and Cognitive-Behavioral Changes in Patients With Chronic Low Back Pain: A Case-Control Study. *Pain Manag Nurs* 2021;22(5):599-604.
125. McPhee ME, Vaegter HB, Graven-Nielsen T. Alterations in pronociceptive and antinociceptive mechanisms in patients with low back pain: a systematic review with meta-analysis. *Pain* 2020;161(3):464-475.
126. Terkelsen AJ, Andersen OK, Hansen PO, Jensen TS. Effects of heterotopic- and segmental counter-stimulation on the nociceptive withdrawal reflex in humans. *Acta Physiol Scand* 2001;172(3):211-217.
127. Oono Y, Nie H, Matos RL, Wang K, Arendt-Nielsen L. The inter- and intra-individual variance in descending pain modulation evoked by different conditioning stimuli in healthy men. *Scand J Pain* 2011;2(4):162-169.
128. Defrin R, Tsedek I, Lugasi I, Moriles I, Urca G. The interactions between spatial summation and DNIC: Effect of the distance between two painful stimuli and attentional factors on pain perception. *Pain* 2010;151(2):489-495.
129. Vanegas H, Schaible HG. Descending control of persistent pain: inhibitory or facilitatory? *Brain Research Reviews* 2004;46(3):295-309.
130. Bouhassira D, Bing Z, Le Bars D. Studies of the brain structures involved in diffuse noxious inhibitory controls: the mesencephalon. *J Neurophysiol* 1990;64(6):1712-1723.
131. Le Bars D, Villanueva L, Bouhassira D, Willer JC. Diffuse noxious inhibitory controls (DNIC) in animals and in man. *Patol Fiziol Eksp Ter* 1992(4):55-65.
132. Bouhassira D, Villanueva L, Bing Z, le Bars D. Involvement of the subnucleus reticularis dorsalis in diffuse noxious inhibitory controls in the rat. *Brain Res* 1992;595(2):353-357.
133. de Resende MA, Silva LF, Sato K, Arendt-Nielsen L, Sluka KA. Blockade of opioid receptors in the medullary reticularis nucleus dorsalis, but not the rostral ventromedial medulla, prevents analgesia produced by diffuse noxious inhibitory control in rats with muscle inflammation. *J Pain* 2011;12(6):687-697.
134. Morton CR, Maisch B, Zimmermann M. Diffuse noxious inhibitory controls of lumbar spinal neurons involve a supraspinal loop in the cat. *Brain Res* 1987;410(2):347-352.

135. Bouhassira D, Villanueva L, Le Bars D. Effects of systemic morphine on diffuse noxious inhibitory controls: role of the periaqueductal grey. *Eur J Pharmacol* 1992;216(2):149-156.
136. Heinricher MM, Tavares I, Leith JL, Lumb BM. Descending control of nociception: Specificity, recruitment and plasticity. *Brain Res Rev* 2009;60(1):214-225.
137. Yu XM, Mense S. Response properties and descending control of rat dorsal horn neurons with deep receptive fields. *Neuroscience* 1990;39(3):823-831.
138. Yu XM, Hua M, Mense S. The effects of intracerebroventricular injection of naloxone, phentolamine and methysergide on the transmission of nociceptive signals in rat dorsal horn neurons with convergent cutaneous-deep input. *Neuroscience* 1991;44(3):715-723.
139. Li JN, Sheets PL. The central amygdala to periaqueductal gray pathway comprises intrinsically distinct neurons differentially affected in a model of inflammatory pain. *J Physiol* 2018;596(24):6289-6305.
140. Cheriyan J, Sheets PL. Peripheral nerve injury reduces the excitation-inhibition balance of basolateral amygdala inputs to prelimbic pyramidal neurons projecting to the periaqueductal gray. *Mol Brain* 2020;13(1):100.
141. Huang J, Gadotti VM, Chen L et al. A neuronal circuit for activating descending modulation of neuropathic pain. *Nat Neurosci* 2019;22(10):1659-1668.
142. Ji G, Sun H, Fu Y et al. Cognitive impairment in pain through amygdala-driven prefrontal cortical deactivation. *J Neurosci* 2010;30(15):5451-5464.
143. Gerhardt A, Eich W, Treede RD, Tesarz J. Conditioned pain modulation in patients with nonspecific chronic back pain with chronic local pain, chronic widespread pain, and fibromyalgia. *Pain* 2017;158(3):430-439.
144. Allen M, Poggiali D, Whitaker K, Marshall TR, Kievit RA. Raincloud plots: a multi-platform tool for robust data visualization. *Wellcome Open Res* 2019;4:63.
145. Chen Z, Chen X, Liu M et al. Disrupted functional connectivity of periaqueductal gray subregions in episodic migraine. *J Headache Pain* 2017;18(1):36.
146. Chen F, Zhang S, Li P et al. Disruption of Periaqueductal Gray-default Mode Network Functional Connectivity in Patients with Crohn's Disease with Abdominal Pain. *Neuroscience* 2023;517:96-104.
147. Cifre I, Sitges C, Fraiman D et al. Disrupted functional connectivity of the pain network in fibromyalgia. *Psychosom Med* 2012;74(1):55-62.
148. Li Z, Liu M, Lan L et al. Altered periaqueductal gray resting state functional connectivity in migraine and the modulation effect of treatment. *Sci Rep* 2016;6:20298.

149. Mao CP, Yang HJ, Yang QX et al. Altered Amygdala-prefrontal Connectivity in Chronic Nonspecific Low Back Pain: Resting-state fMRI and Dynamic Causal Modelling Study. *Neuroscience* 2022;482:18-29.
150. Truini A, Tinelli E, Gerardi MC et al. Abnormal resting state functional connectivity of the periaqueductal grey in patients with fibromyalgia. *Clin Exp Rheumatol* 2016;34(2 Suppl 96):S129-133.
151. Yu R, Gollub RL, Spaeth R et al. Disrupted functional connectivity of the periaqueductal gray in chronic low back pain. *Neuroimage Clin* 2014;6:100-108.
152. Zhang Y, Mao Z, Pan L et al. Dysregulation of Pain- and Emotion-Related Networks in Trigeminal Neuralgia. *Front Hum Neurosci* 2018;12:107.
153. Liu K, Cheng J, Cao Y et al. Abnormally Increased Effective Connectivity of the Periaqueductal Gray in Migraine Without Aura Patients. *Clin J Pain* 2023;39(4):175-179.
154. Meier ML, Stampfli P, Humphreys BK et al. The impact of pain-related fear on neural pathways of pain modulation in chronic low back pain. *Pain Rep* 2017;2(3):e601.
155. Ongur D, Price JL. The organization of networks within the orbital and medial prefrontal cortex of rats, monkeys and humans. *Cereb Cortex* 2000;10(3):206-219.

## Figure legends

**Figure 1 Study design overview.** Main outcomes of interest are highlighted in bold italic. Red crosses indicate locations at which PPTs were assessed, i.e. over the erector spinae muscle within the lower back (most painful area) and at the thenar eminence of the non-dominant hand (pain-free control area). The CPM-SHAM paradigm was only performed at the non-dominant hand.

**Figure 2 <sup>1</sup>H-MRS VOI placement and acquired spectra.** (A) The VOI was placed according to anatomical landmarks such as the cerebral aqueduct. The yellow box represents the nominal size of the VOI (11x15x18 mm<sup>3</sup> [APxLRxFH]). Blue-shaded areas represent the VSS bands used to minimize errors in chemical-shift displacement and to achieve consistent localization volumes across all metabolites of interest. The unshaded area within the yellow box represents the final VOI size (8.8x10.2x12.2 mm<sup>3</sup>). (B) Representative single spectrum (SNR = 19, FWHM H<sub>2</sub>O = 5.1 Hz, age = within 53.5 years (median age of the cohort) ± 5). (C) Overlaid

single spectra together with the group average (bold) for CLBP patients (purple) and controls (turquoise). The schematic brain was adapted from Servier Medical Art ([smart.servier.com](http://smart.servier.com)).

**Figure 3 Lower Glx/GABA in CLBP patients driven by decreased Glx and increased GABA.** The raincloud plots<sup>144</sup> show the raw data (coloured dots), means and 95% confidence intervals (black dots and bars) and probability distributions (vertical "clouds") of Glx/GABA (A) and Glx and GABA separately (B) for CLBP patients (purple) and controls (turquoise). \* $P < 0.05$ , \*\* $P < 0.01$ .

**Figure 4 Inhibitory CPM effects on PPTs in CLBP patients and pain-free controls.** (A) PPT changes in controls in response to the CPM (blue) and the CPM-SHAM (white) paradigm performed at the non-dominant hand (pain-free control area). Data are presented as PPT values at each timepoint of the 2 paradigms (left panel) and as absolute parallel (PPT before - PPT during) and sequential (PPT before - PPT after) PPT changes in response to the 2 paradigms ( $\Delta$ PPT; right panel). (B) PPT values before and during the cold water bath reflecting parallel CPM effects at the lower back (most painful area) and at the non-dominant hand of CLBP patients (purple) and controls (turquoise). (C) Group comparison of relative parallel CPM effects (CPM  $\Delta$ PPT), i.e.  $([PPT \text{ before} - PPT \text{ during}] / PPT \text{ before}) * 100$ , at the lower back and at the non-dominant hand. Negative absolute and relative  $\Delta$ PPTs reflect inhibitory effects, positive values reflect facilitatory effects. The dotted line depicts a null effect. The plots represent the raw data (coloured semi-transparent dots), means (coloured dots) and 95% confidence intervals (black bars). \* $P < 0.05$ , \*\* $P < 0.01$ , \*\*\* $P < 0.001$ .

**Figure 5 Glx/GABA- and CPM effect-related associations.** (A) and (B) visualize the results of the linear models testing cohort differences in associations of Glx/GABA with 'true' CPM effects and experimental pressure pain sensitivity. Pearson correlations reflect the models' interaction effects of interest, i.e. 'true' CPM effect X cohort' (significant for the non-dominant hand) and 'experimental pressure pain sensitivity X cohort' (significant for the lower back and the non-dominant hand). (A) shows Pearson correlations between Glx/GABA and relative parallel CPM effects (CPM  $\Delta$ PPT) and (B) shows Pearson correlations between Glx/GABA and experimental pressure pain sensitivity, i.e. PPTs, of CLBP patients (purple) and controls (turquoise) at the lower back (most painful area) and at the non-dominant hand (pain-free control area). (C) Spearman correlations between relative parallel CPM effects (CPM  $\Delta$ PPT)

and average clinical pain intensities over the past 4 weeks (4wk clinical pain), i.e. 'trait' pain, and within-CPM-session clinical pain (CPM-session clinical pain), i.e. 'state' pain. Left panels show ranked data representative of Spearman correlations. To help with interpretability, the raw data is shown in the right panels. Negative relative CPM  $\Delta$ PPTs reflect inhibitory CPM effects, positive relative CPM  $\Delta$ PPTs reflect facilitatory CPM effects. The dotted line depicts a null CPM effect.

**Figure 6 Clinical evidence for altered amygdala-medial prefrontal cortex (mPFC)-PAG connectivity patterns in chronic pain and potential consequences for PAG-driven descending pain inhibition.** Summary of resting-state functional connectivity (rsFC) studies which found altered rsFC,<sup>145-152</sup> altered effective rsFC (effFC)<sup>153</sup> and altered task rsFC (during observation of harmful activities)<sup>154</sup> in the amygdala-mPFC-PAG circuit in chronic pain patients compared to pain-free controls. Altered supratentorial input to the PAG might be associated with dysregulated PAG metabolites and PAG-driven descending inhibition, such as the decreased Glx/GABA and the lacking association between Glx/GABA and experimental pressure pain sensitivity in CLBP patients observed in the present study. Here, the anterior cingulate cortex was considered to be part of the mPFC.<sup>155</sup> The schematic brain and spinal cord were adapted from Servier Medical Art ([smart.servier.com](https://smart.servier.com)).
